# Supplementary material
Source: publisher figshare collection journal article supplement (https://acs.figshare.com/ndownloader/files/7234613)

## Supporting Information

# Asymmetric Total Synthesis of Lepadiformine C Using Memory of Chirality in an Intramolecular Ester Enolate Michael Addition

Seokwoo Lee, Minsik Bae, Jinkyung In, Jae Hyun Kim and Sanghee Kim\*

College of Pharmacy, Seoul National University, Seoul, 08826 (Korea)

pennkim@snu.ac.kr

## Contents

|                                                                                            |                |
|--------------------------------------------------------------------------------------------|----------------|
| <b>A. General .....</b>                                                                    | <b>S1</b>      |
| <b>B. Experimental procedure and spectroscopic data analysis</b>                           |                |
| <b>B-1. Synthesis of Michael substrate 9 .....</b>                                         | <b>S2–S3</b>   |
| <b>B-2. Intramolecular Michael addition of 9 .....</b>                                     | <b>S3–S5</b>   |
| <b>B-3. Exploratory studies to determine the mechanism of Michael addition .....</b>       | <b>S5–S9</b>   |
| <b>B-4. Synthesis of lepadiformine C (1) .....</b>                                         | <b>S9–S16</b>  |
| <b>C. Computational study .....</b>                                                        | <b>S17–S19</b> |
| <b>D. Chiral HPLC chromatograms of S2 .....</b>                                            | <b>S20–S21</b> |
| <b>E. Copies of spectra (<sup>1</sup>H NMR, <sup>13</sup>C NMR, COSY, NOESY NMR) .....</b> | <b>S22–S33</b> |

## A. General

All of the chemicals were of reagent grade and were used as received. All of the reactions were performed under an inert atmosphere consisting of dry nitrogen using distilled dry solvents. The reactions were monitored by thin layer chromatography (TLC) analysis using silica gel 60 F-254 TLC plates. Flash column chromatography was performed on silica gel (230-400 mesh). The optical rotations were measured using sodium light (D line 589.3 nm) at 20 °C. <sup>1</sup>H NMR (300, 400, 500, 600 or 800 MHz) and <sup>13</sup>C NMR (100, 125, 150 or 200 MHz) spectra were recorded in  $\delta$  units relative to the non-deuterated solvent as the internal reference. The IR spectra were recorded on a Fourier Transform Infrared spectrometer. High-resolution mass spectra (HRMS) were recorded using fast atom bombardment (FAB). HPLC was performed on an Agilent 1200 series instrument with a diode array detector (DAD) and CHIRALCEL OD-H column (0.46  $\times$  25 cm, 5  $\mu$ m).

## B. Experimental procedure and spectroscopic data analysis

### B-1. Synthesis of Michael substrate 9

#### (*E*)-6-(*tert*-butoxy)-6-oxohex-4-enoic acid (**10**)

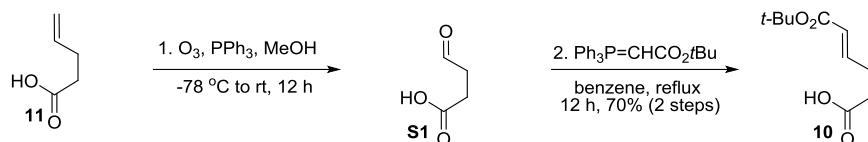

A solution of **11** (12.5 g, 125 mmol) in MeOH (400 mL) was cooled to  $-78^\circ\text{C}$ . Ozone was bubbled through the solution until blue color persisted. When TLC indicated the absence of the starting material, the ozone inlet tube was replaced with nitrogen, which was bubbled through the solution for 30 min to remove any excess ozone. Triphenylphosphine (65.5 g, 245 mmol) was added in one portion, the cooling bath was removed, and the mixture was stirred for 6 h at room temperature. The reaction mixture was filtered, and the filtrate was concentrated under reduced pressure to afford **S1** as a colorless oil, which was used in the subsequent step without further purification.

To a solution of **S1** in benzene (400 mL) was added *tert*-butyl 2-(triphenyl- $\lambda^5$ -phosphanylidene)acetate (61.1 g, 162 mmol) at room temperature. The reaction mixture was heated to reflux for 12 h and then cooled to room temperature. The mixture was thrice extracted with saturated aqueous  $\text{Na}_2\text{CO}_3$ . The combined aqueous layers were thrice washed with EtOAc, and then acidified with 1N HCl (pH = 2). The aqueous solution was thrice extracted with EtOAc. The combined organic layers were dried over  $\text{MgSO}_4$  and concentrated in vacuo to afford known compound **10** (17.5 g, 70%, 2 steps) as a colorless oil, which was used in the subsequent step without further purification.

#### Ethyl (*E*)-(6-(*tert*-butoxy)-6-oxohex-4-enoyl)-L-prolinate (**9**)

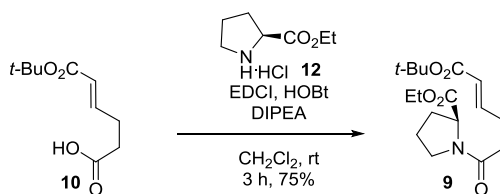

To a solution of acid **10** (7.95 g, 39.7 mmol) in CH<sub>2</sub>Cl<sub>2</sub> (50 mL) were added EDCI (9.25 g, 59.6 mmol), HOBt (8.05 g, 59.6 mmol) and DIPEA (27.7 mL, 159 mmol) at 0 °C. The resulting mixture was stirred for 10 min, and then a solution of L-proline ethyl ester<sup>1</sup> (**12**, 8.56 g, 47.6 mmol) in CH<sub>2</sub>Cl<sub>2</sub> (50 mL) was added at 0 °C. The reaction mixture was stirred at room temperature for 3 h and then, diluted with CH<sub>2</sub>Cl<sub>2</sub>. The combined organic layers were washed with 1N HCl, saturated NaHCO<sub>3</sub>, and brine, dried over MgSO<sub>4</sub>, filtered, and concentrated under reduced pressure. The residue was purified by flash column chromatography on silica gel (hexane/EtOAc, 1:1) to yield **9** (9.69 g, 75%) as a colorless oil:  $[\alpha]_D^{20}$  -41.6 (*c* 1.00, CHCl<sub>3</sub>); <sup>1</sup>H NMR (CDCl<sub>3</sub>, 800 MHz; two rotamers in a 4:1 ratio)  $\delta$  6.86–6.78 (m, 1H), 5.75–5.70 (m, 1H), 4.43 (dd, *J* = 8.84 Hz, 3.80 Hz, 0.8H), 4.43 (dd, *J* = 8.64 Hz, 2.56 Hz, 0.2H), 4.19–4.11 (m, 2H), 3.62–3.57 (m, 1H), 3.54–3.51 (m, 0.2H), 3.46–3.43 (m, 0.8H), 2.54–2.47 (m, 2H), 2.46–2.43 (m, 1H), 2.41–2.35 (m, 0.8H), 2.30–2.26 (m, 0.2H), 2.25–2.19 (m, 0.2H), 2.17–2.12 (m, 0.8H), 2.06–2.01 (m, 1H), 1.97–1.92 (m, 1.6H), 1.88–1.85 (m, 0.4H) 1.43 (s, 9H), 1.25 (t, *J* = 7.12 Hz, 0.6H), 1.23 (t, *J* = 7.16 Hz, 2.4H); <sup>13</sup>C NMR (200 MHz, CDCl<sub>3</sub>; rotamer 1/rotamer 2)  $\delta$  172.2, 170.2, 165.8, 146.22/146.2, 123.6, 80.1, 61.6/61.0, 59.4/58.8, 46.9/46.4, 32.6/32.5, 31.4/29.15, 28.1 (3C), 27.1/26.8, 24.7/22.5, 14.14/14.10; IR (neat, cm<sup>-1</sup>)  $\nu_{\max}$  2980, 1743, 1712, 1652, 1432, 1369, 1320, 1294, 1257, 1243, 1186, 1149; HRMS (FAB) calcd. for C<sub>17</sub>H<sub>28</sub>NO<sub>5</sub> ([M+H]<sup>+</sup>) 326.1967, found 326.1961.

## B-2. Intramolecular Michael addition of **9**

### Representative procedure for the intramolecular Michael addition of **9**

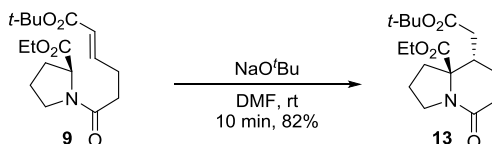

To a solution of NaO<sup>t</sup>Bu (17.0 mg, 0.169 mmol) in DMF (8 mL) was added a solution of **9** (50.0 mg, 0.154 mmol) in DMF (7 mL) dropwise at room temperature, and the mixture was stirred for 10 min at

<sup>1</sup> Nazarova, L. S.; Rozonov, Yu. B.; Likhoshesterov, A. M.; Morozova, T. V.; Skoldinov, A. P.; Kaverina N. V.; Markin, V. A. *Pharm. Chem. J.* **1984**, *18*, 811.

room temperature. The reaction was quenched by the addition of a saturated  $\text{NH}_4\text{Cl}$  aqueous solution and concentrated in vacuo. The residue was dissolved in EtOAc and water, and extracted twice with EtOAc. The organic extracts were dried over  $\text{MgSO}_4$  and concentrated under reduced pressure. The yield was determined by  $^1\text{H}$  NMR analysis of the crude reaction mixture using  $\text{CH}_2\text{Br}_2$  as internal standard.

**13**:  $[\alpha]^{22}_{\text{D}} -38.6$  (*c* 0.5,  $\text{CHCl}_3$ );  $^1\text{H}$  NMR (400 MHz,  $\text{CDCl}_3$ )  $\delta$  4.19 (q,  $J = 6.21$  Hz, 2H), 3.60–3.53 (m, 2H), 2.97–2.92 (m, 1H), 2.41–2.31 (m, 3H), 2.22–2.18 (m, 1H), 2.08 (dd,  $J = 15.5$  Hz, 8.22 Hz, 1H), 1.86–1.58 (m, 5H), 1.43 (s, 9H), 1.25 (t,  $J = 7.12$  Hz, 3H);  $^{13}\text{C}$  NMR (200 MHz,  $\text{CDCl}_3$ )  $\delta$  173.6, 171.1, 168.7, 81.1, 72.3, 61.9, 45.1, 33.8, 33.5, 33.1, 27.9 (3C), 26.8, 23.5, 20.4, 14.1; IR (neat,  $\text{cm}^{-1}$ )  $\nu_{\text{max}}$  2979, 1729, 1650, 1447, 1412, 1369, 1269, 1226, 1208, 1090, 1023; HRMS (FAB): calcd. for  $\text{C}_{17}\text{H}_{28}\text{NO}_5$  ( $[\text{M}+\text{H}]^+$ ) 326.1967, found 326.1958.

#### Representative procedure for synthesis of thioamide derivative **S2**

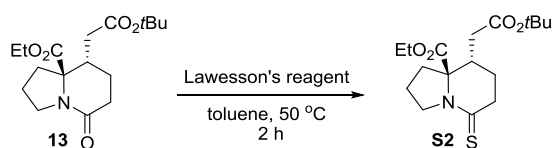

Crude product **13** (10.0 mg) was dissolved in toluene (0.5 mL) and Lawesson's reagent (12.0 mg, 0.0307 mmol) was added. The reaction mixture was heated to 50 °C for 2 h and then cooled to room temperature. The mixture was concentrated, and the residue was purified by flash column chromatography on silica gel (hexane/EtOAc, 3:1) to yield **S2** (7.0 mg) as a yellow oil. The enantiomeric purity of **S2** was determined by chiral HPLC analysis. The spectral data for **S2** was in good agreement with **15**, with the exception of optical rotation (see page S10).

**S2**:  $[\alpha]^{20}_{\text{D}} -20.2$  (*c* 0.5,  $\text{CHCl}_3$ ).

**Table S1.** Additional conditions tested to optimize the intramolecular Michael addition of **9** (see Table 1 in the main text).<sup>a</sup>

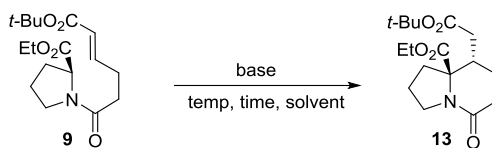

| entry | solvent            | base (equiv)              | temp | time | yield (%) <sup>b</sup> | ee (%) <sup>c</sup> |
|-------|--------------------|---------------------------|------|------|------------------------|---------------------|
| 1     | THF                | NaO <sup>t</sup> Bu (3.0) | rt   | 12 h | 0                      | -                   |
| 2     | CH <sub>3</sub> CN | NaO <sup>t</sup> Bu (3.0) | rt   | 12 h | 49                     | 83                  |

<sup>a</sup>Reactions were performed with **9** (50 mg, 0.15 mmol) at a substrate concentration of 0.01 M. <sup>b</sup>Yield was estimated from the <sup>1</sup>H analysis. <sup>c</sup>Enantiomeric excess was determined by chiral HPLC analysis of thioamide derivative from **13**.

### B-3 Exploratory studies to determine the mechanism of Michael addition.

#### B-3-a. Re-exposure of Michael product **13**

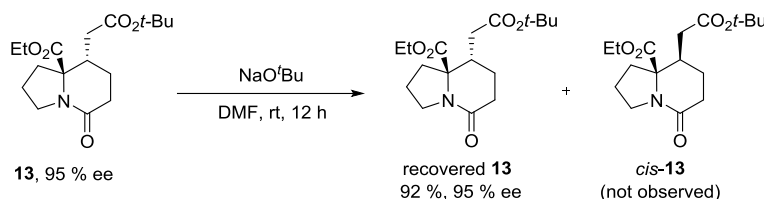

Michael product **13** (9.0 mg, 0.028 mol, 95% ee), which was synthesized at  $-20\text{ }^{\circ}\text{C}$ , was dissolved in DMF (2.8 mL) and NaO<sup>t</sup>Bu (3.0 mg, 0.030 mmol) was added. The reaction mixture was stirred for 12 h at room temperature. The reaction was quenched by the addition of a saturated NH<sub>4</sub>Cl aqueous solution and concentrated in vacuo. The residue was dissolved in EtOAc and water, and extracted twice with EtOAc. The organic extracts were dried over MgSO<sub>4</sub> and concentrated under reduced pressure. The residue was purified by flash column chromatography on silica gel (hexane/EtOAc, 3:1) to yield **13** (8.3 mg, 92%) as a yellow oil. The enantiomeric purity of obtained product **13** was determined to be 95% by chiral HPLC analysis after the conversion to the thioamide derivative.

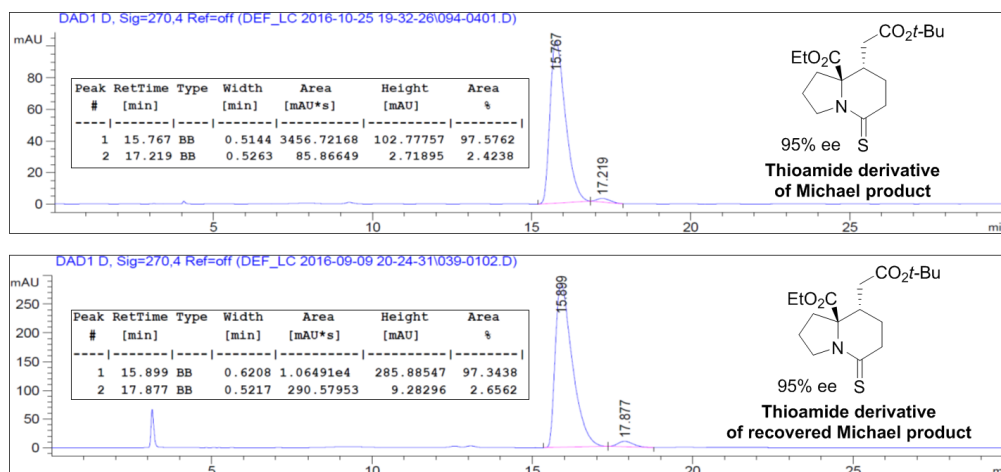

**Figure S1.** Chiral HPLC chromatograms of thioamide derivatives.

### B-3-b. Incomplete reaction of intramolecular Michael addition

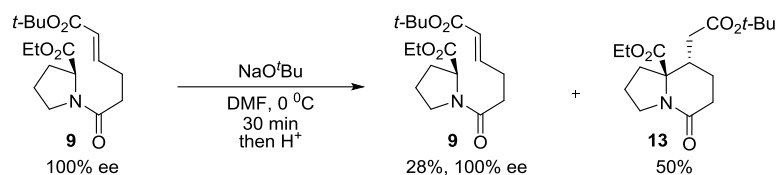

To a solution of NaOtBu (17.0 mg, 0.169 mmol) in DMF (8 mL) was added a solution of **9** (50.0 mg, 0.154 mmol, 100% ee) in DMF (7 mL) dropwise at 0 °C, and the mixture was stirred for 30 min at 0 °C. The reaction was quenched by the addition of a saturated NH<sub>4</sub>Cl aqueous solution and concentrated in vacuo. The residue was dissolved in EtOAc and water, and extracted twice with EtOAc. The organic extracts were dried over MgSO<sub>4</sub> and concentrated under reduced pressure. The residue was purified by flash column chromatography on silica gel (hexane/EtOAc, 3:1) to yield **9** (14.0 mg, 28%, 100% ee) and **13** (25.0 mg, 50%). The enantiomeric purity of **9** was determined using chiral HPLC analysis.

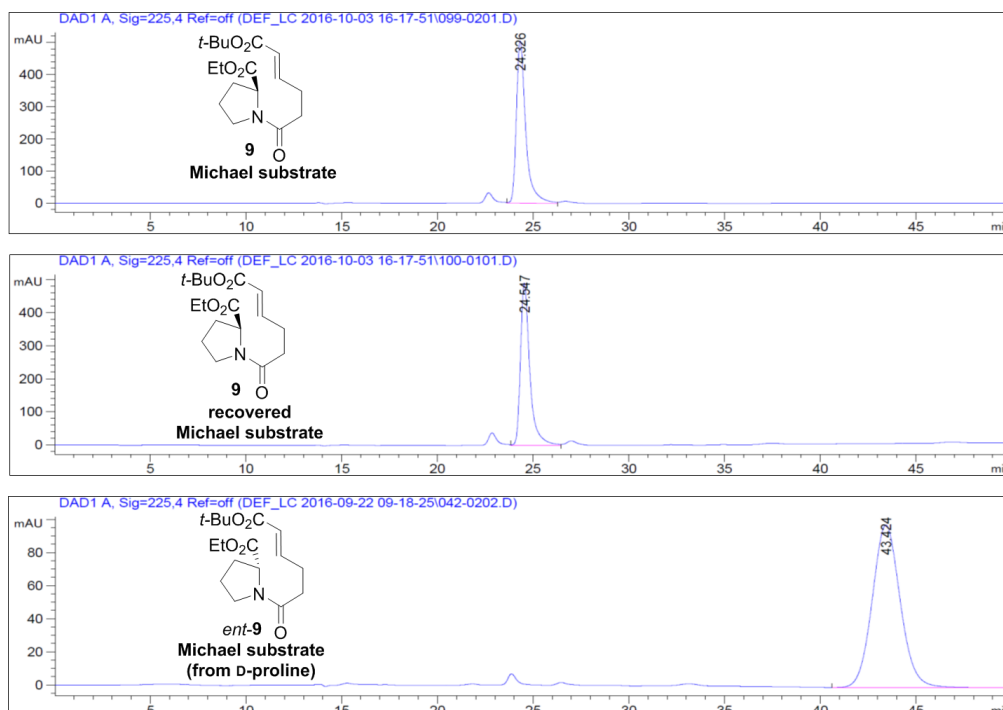

**Figure S2.** Chiral HPLC chromatograms of Michael substrates.

### B-3-c. Deuterium study of intramolecular Michael addition

#### Preparation of S3

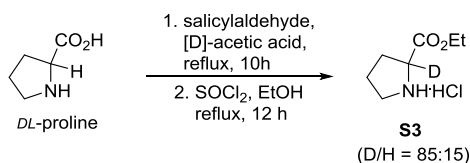

To a solution of DL-proline (2.00 g, 17.4 mmol) in [D]-acetic acid (37 mL) was added salicylaldehyde (0.164 mL, 1.54 mmol), and the mixture was heated to reflux for 10 h. The reaction mixture was concentrated under reduced pressure. To afford known compound [D]-proline as a colorless oil, which was used in the subsequent step without further purification.

To a solution of [D]-proline in EtOH (44 mL) was added SOCl<sub>2</sub> (1.41 mL, 19.3 mmol) dropwise at 0 °C, and the mixture was heated to reflux for 12 h. The reaction mixture was concentrated under reduced pressure. To afford S3 (D/H = 85:15) as a light yellow oil, which was used in the subsequent step without further purification.

### The intramolecular Michael addition of [D]-9.

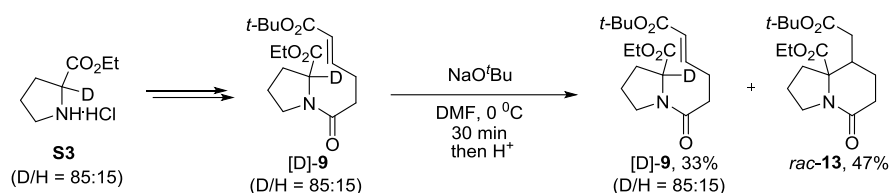

[D]-9 was prepared according to the procedure described above for **9** using **S3** instead of **12**. To a solution of NaO<sup>t</sup>Bu (4.0 mg, 0.051 mmol) in DMF (2.6 mL) was added a solution of [D]-9 (15.0 mg, 0.0461 mmol, D/H = 85:15) in DMF (2 mL) dropwise at 0 °C, and the mixture was stirred for 30 min at 0 °C. The reaction was quenched by the addition of a saturated NH<sub>4</sub>Cl aqueous solution and concentrated in vacuo. The residue was dissolved in EtOAc and water, and extracted twice with EtOAc. The organic extracts were dried over MgSO<sub>4</sub> and concentrated under reduced pressure. The residue was purified by flash column chromatography on silica gel (hexane/EtOAc, 3:1) to yield [D]-9 (5.0 mg, 33%, D/H = 85:15) and *rac*-13 (7.0 mg, 47%).

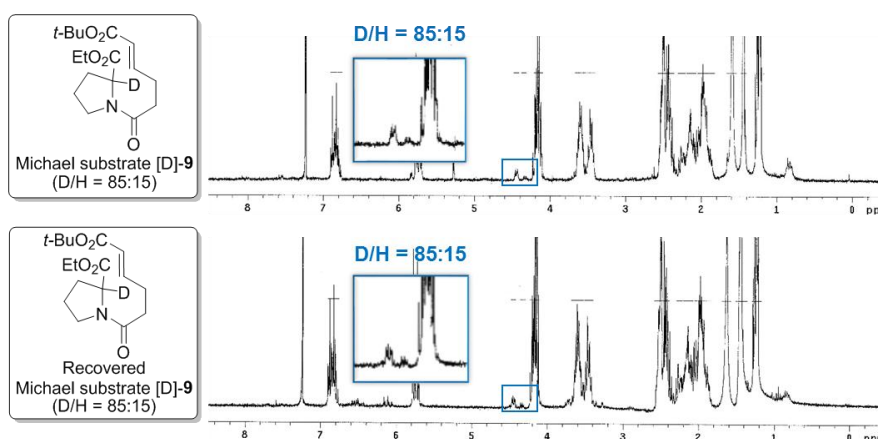

**Figure S3.** <sup>1</sup>H NMR spectra of [D]-9 and recovered [D]-9 after the Michael reaction.

### B-3-d. The intramolecular Michael addition of **9** in the presence of protic solvent

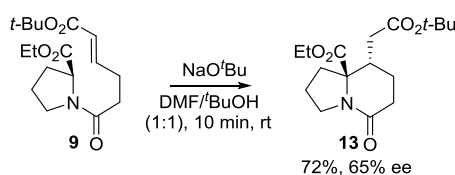

To a solution of NaO<sup>t</sup>Bu (17.0 mg, 0.169 mmol) in DMF (8 mL) was added a solution of **9** (50.0 mg, 0.154 mmol) in DMF (7 mL) dropwise at room temperature, and the mixture was stirred for 10 min at

room temperature. The reaction was quenched by the addition of a saturated  $\text{NH}_4\text{Cl}$  aqueous solution and concentrated in vacuo. The residue was dissolved in EtOAc and water, and extracted twice with EtOAc. The organic extracts were dried over  $\text{MgSO}_4$  and concentrated under reduced pressure. The yield was determined by  $^1\text{H}$  NMR analysis of the crude reaction mixture using  $\text{CH}_2\text{Br}_2$  as internal standard (72%). Enantiomeric excess was determined by chiral HPLC analysis of thioamide derivative **S2** (65% ee).

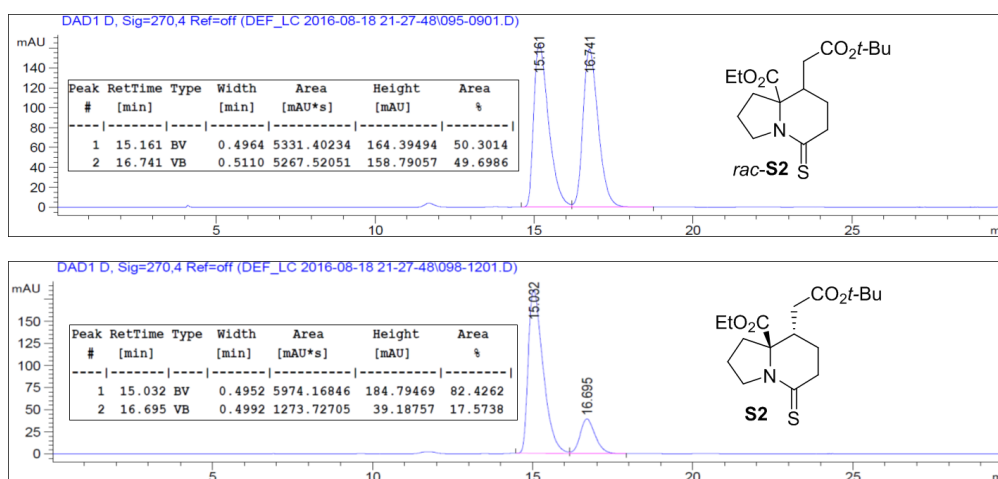

**Figure S4.** Chiral HPLC chromatograms of *rac*-**S2** and **S2** which was synthesized with  $\text{NaO}^t\text{Bu}$  at rt in DMF/ $^t\text{BuOH}$  (1:1).

## B-4 Synthesis of lepadiformine C (1)

### Ethyl D-prolinate hydrochloride (*ent*-12)

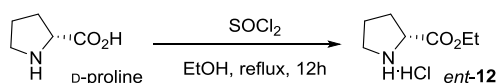

To a solution of D-proline (10.0 g, 86.9 mmol) in EtOH (200 mL) was added  $\text{SOCl}_2$  (7.00 mL, 96.0 mmol) dropwise at  $0^\circ\text{C}$ , and the mixture was heated to reflux for 12 h. The reaction mixture was concentrated under reduced pressure. To afford *ent*-12 as a light yellow oil, which was used in the subsequent step without further purification.

**Ethyl (8*R*,8*aS*)-8-(2-(*tert*-butoxy)-2-oxoethyl)-5-oxohexahydroindolizine-8*a*(1*H*)-carboxylate**  
**(*ent*-13)**

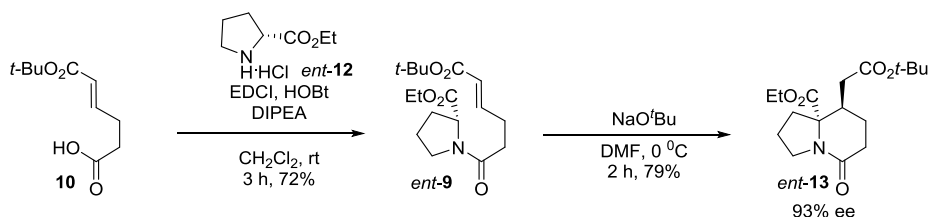

*Ent*-9 was prepared according to the procedure described above for **9** using *ent*-12<sup>1</sup> instead of **12** (9.30g, 72%). The spectral data for *ent*-9 were in good agreement with **9** excepting optical rotation (See page S3): *ent*-9:  $[\alpha]^{20}_D$  52.7 (*c* 1.0, CHCl<sub>3</sub>).

To a solution of NaO'Bu (844 mg, 8.78 mmol) in DMF (400 mL) was added a solution of **9** (2.60 g, 8.00 mmol) in DMF (400 mL) dropwise, and the mixture was stirred for 2 h at 0 °C. The reaction was quenched by the addition of a saturated NH<sub>4</sub>Cl aqueous solution and concentrated in vacuo. The residue was dissolved in EtOAc and water, and extracted twice with EtOAc. The organic extracts were dried over MgSO<sub>4</sub> and concentrated under reduced pressure. The residue was purified by flash column chromatography on silica gel (EtOAc/CH<sub>2</sub>Cl<sub>2</sub>, 1:1) to yield *ent*-13 (2.05 g, 79%) as a light yellow oil. Enantiomeric excess was determined by chiral HPLC analysis of thioamide derivative (93% ee). The spectral data for *ent*-13 were in good agreement with **13** with the exception of optical rotation (see page S4): *ent*-13:  $[\alpha]^{20}_D$  38.2 (*c* 0.1, CHCl<sub>3</sub>).

**Ethyl (8*R*,8*aS*)-8-(2-(*tert*-butoxy)-2-oxoethyl)-5-thioxohexahydroindolizine-8*a*(1*H*)-carboxylate**  
**(15)**

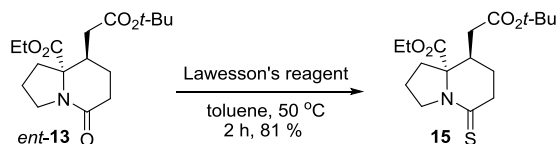

To a solution of *ent*-13 (2.00 g, 6.15 mmol) in toluene (60 mL) was added Lawesson's reagent (1.49 g, 3.69 mmol). The reaction mixture was heated to 50 °C for 2 h and then cooled to room temperature. The mixture was concentrated, and the residue was purified by flash column chromatography on silica gel (hexane/EtOAc, 3:1) to yield **15** (1.70 g, 81%) as a yellow oil:  $[\alpha]^{20}_D$  19.8 (*c* 0.5, CHCl<sub>3</sub>); <sup>1</sup>H

NMR (CDCl<sub>3</sub>, 800 MHz)  $\delta$  4.23–4.17 (m, 2H), 3.92 (dd,  $J$  = 9.64 Hz, 5.16 Hz, 2H), 3.04 (ddd,  $J$  = 10.4 Hz, 7.82 Hz, 3.86 Hz, 1H), 3.00–2.97 (m, 1H), 2.91–2.86 (m, 1H), 2.34 (dd,  $J$  = 15.8 Hz, 6.40 Hz, 1H), 2.31 (ddd,  $J$  = 6.44 Hz, 1.04 Hz, 1H), 2.05 (dd,  $J$  = 15.8 Hz, 8.04 Hz, 1H), 1.95–1.91 (m, 1H), 1.88–1.84 (m, 1H), 1.72–1.63 (m, 3H), 1.42 (s, 9H), 1.25 (t,  $J$  = 7.12 Hz, 3H); <sup>13</sup>C NMR (CDCl<sub>3</sub>, 200 MHz)  $\delta$  197.3, 171.9, 170.8, 81.3, 74.2, 62.3, 53.1, 36.2, 34.2, 33.6, 33.2, 28.0(3C), 23.4, 19.8, 14.1; IR (neat, cm<sup>-1</sup>)  $\nu_{\text{max}}$  2976, 2936, 1726, 1477, 1454, 1413, 1368, 1267, 1209, 1148, 1107, 1070, 1015, 844; HRMS (FAB) calcd. for C<sub>17</sub>H<sub>28</sub>NO<sub>4</sub>S ([M+H]<sup>+</sup>) 342.1739, found 342.1729.

**Ethyl (5*R*,8*R*,8*a**S*)-8-(2-(*tert*-butoxy)-2-oxoethyl)-5-butylhexahydroindolizine-8*a*(1*H*)-carboxylate (**17**)**

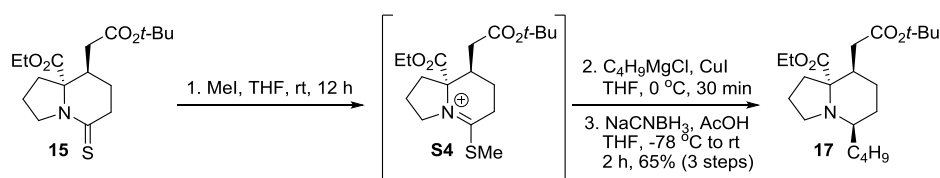

To a solution of **15** (1.00 g, 2.93 mmol) in THF (15 mL) was added iodomethane (0.910 mL, 14.6 mmol), and the mixture was stirred for 12 h at room temperature. The mixture was evaporated to dryness in vacuo to yield iminium salt **S4** as a yellow oil.

To a slurry of copper iodide (558 mg, 2.93 mmol) in anhydrous THF (14 mL) was added a solution of butylmagnesium chloride (2.20 mL, 4.39 mmol, 2.0 M solution in THF) at 0 °C under a N<sub>2</sub> atmosphere. The resulting mixture was stirred for 30 min at 0 °C, and then a solution of iminium salt **S4** in anhydrous THF (15 mL) was added at 0 °C. The reaction mixture was stirred for 30 min at 0 °C and then cooled to –78 °C. NaCNBH<sub>3</sub> (184 mg, 2.93 mmol) was added to the mixture at –78 °C. The reaction mixture was stirred for 15 min and then glacial AcOH (3.00 mL) was added at –78 °C. After 15 min, the resulting mixture was allowed to slowly warm to rt and stirred for 2 h at room temperature. The reaction was quenched by the slow addition of a saturated Na<sub>2</sub>CO<sub>3</sub> aqueous solution at 0 °C, and stirred for 30 min at room temperature. Then, the mixture was extracted twice with EtOAc. The combined organic layers were washed with brine, dried over MgSO<sub>4</sub>, and concentrated in vacuo. The residue was purified by flash chromatography on silica gel (hexane/EtOAc, 10:1) to yield **17** (700 mg,

65%) as a light yellow oil:  $[\alpha]^{24}_{\text{D}} -11.9$  ( $c$  0.5,  $\text{CHCl}_3$ );  $^1\text{H}$  NMR ( $\text{CDCl}_3$ , 800 MHz)  $\delta$  4.15–4.09 (m, 2H), 3.06–3.04 (m, 1H), 3.00–2.97 (m, 1H), 2.91–2.89 (m, 1H), 2.82–2.79 (m, 1H), 2.49 (dd,  $J = 15.9$  Hz, 6.68 Hz, 1H), 2.20 (dd,  $J = 15.9$  Hz, 6.92 Hz, 1H), 1.80–1.76 (m, 1H), 1.69–1.53 (m, 5H), 1.43 (s, 9H), 1.40–1.34 (m, 2H), 1.32–1.15 (m, 9H), 0.87 (t,  $J = 7.08$  Hz, 3H);  $^{13}\text{C}$  NMR ( $\text{CDCl}_3$ , 200 MHz)  $\delta$  175.6, 173.2, 80.0, 71.4, 59.9, 54.8, 47.3, 34.7, 34.5, 33.3, 33.0, 28.1(C3), 27.2, 27.0, 25.5, 23.2, 20.2, 14.3, 14.1; IR (neat,  $\text{cm}^{-1}$ )  $\nu_{\text{max}}$  2958, 2924, 2862, 1728, 1368, 1149, 1098; HRMS (FAB) calcd. for  $\text{C}_{21}\text{H}_{38}\text{NO}_4$  ( $[\text{M}+\text{H}]^+$ ) 368.2801, found 368.2796.

**Ethyl (5*R*,8*R*,8*a*S)-5-butyl-8-(2-hydroxyethyl)hexahydroindolizine-8*a*(1*H*)-carboxylate (**18**)**

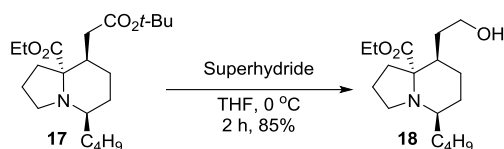

To a solution of this acid **17** (500 mg, 1.36 mmol) in THF (14 mL) was added Superhydride (3.40 mL, 3.40 mmol, 1.0 M solution in THF) at 0 °C, and the resulting mixture was stirred for 2 h at 0 °C. The reaction was quenched by the addition of a saturated  $\text{NH}_4\text{Cl}$  aqueous solution, and extracted twice with EtOAc. The organic extracts were dried over  $\text{MgSO}_4$  and concentrated under reduced pressure. The residue was purified by flash column chromatography on silica gel (EtOAc/acetone, 1:1) to yield **18** (344 mg, 85%) as a light yellow oil:  $[\alpha]^{20}_{\text{D}} -24.5$  ( $c$  0.5,  $\text{CHCl}_3$ );  $^1\text{H}$  NMR ( $\text{CDCl}_3$ , 800 MHz)  $\delta$  4.12 (dd,  $J = 14.2$  Hz, 7.12 Hz, 2H), 3.73–3.70 (m, 1H), 3.61 (td,  $J = 11.3$  Hz, 5.72 Hz, 1H), 3.19 (brs, 1H, OH), 3.06 (td,  $J = 8.48$  Hz, 5.44 Hz, 1H), 3.04–3.01 (m, 1H), 2.95 (td,  $J = 9.14$  Hz, 4.88 Hz, 1H), 2.47 (td,  $J = 9.63$  Hz, 4.90 Hz, 1H), 2.00 (td,  $J = 12.5$  Hz, 9.90 Hz, 1H), 1.84 (td,  $J = 14.6$  Hz, 6.53 Hz, 1H), 1.79–1.76 (m, 1H), 1.75–1.71 (m, 1H), 1.67–1.59 (m, 5H), 1.51 (ddd,  $J = 12.9$  Hz, 8.58 Hz, 4.02 Hz, 1H), 1.43–1.38 (m, 1H), 1.32–1.25 (m, 4H), 1.24 (t,  $J = 7.12$  Hz, 3H), 1.21–1.17 (m, 1H), 0.87 (t,  $J = 7.16$  Hz, 3H);  $^{13}\text{C}$  NMR ( $\text{CDCl}_3$ , 200 MHz)  $\delta$  175.9, 71.7, 61.1, 60.0, 54.7, 47.4, 34.8, 33.7, 32.2, 31.4, 27.5, 26.5, 25.7, 23.1, 20.2, 14.3, 14.1; IR (neat,  $\text{cm}^{-1}$ )  $\nu_{\text{max}}$  3387, 3342, 2933, 2861, 1725, 1461, 1379, 1175, 1144, 1097, 1052, 1022; HRMS (FAB) calcd. for  $\text{C}_{17}\text{H}_{32}\text{NO}_3$  ( $[\text{M}+\text{H}]^+$ ) 298.2382, found 298.2379.

**1-((5*R*,8*R*,8*aS*)-5-butyl-8-(2-hydroxyethyl)hexahydroindolizin-8*a*(1*H*)-yl)ethan-1-one (**19**)**

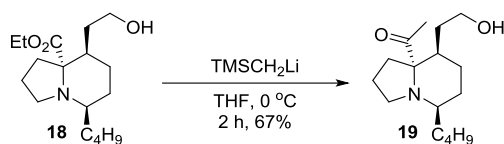

To a solution of this acid **18** (300 mg, 1.01 mmol) in THF (10 mL) was added (Trimethylsilyl)methyl lithium (2.02 mL, 2.02 mmol, 1.0 M solution in pentane) at 0 °C, and the resulting mixture was stirred for 2 h at 0 °C. The reaction was quenched by the slow addition of MeOH at 0 °C, and stirred for 1 h at room temperature. Then, the mixture was diluted with water, and extracted twice with EtOAc. The combined organic layers were washed with brine, dried over MgSO<sub>4</sub>, and concentrated in vacuo. The residue was purified by flash chromatography on silica gel (EtOAc/acetone, 1:1) to yield **19** (180 mg, 62%) as a light yellow oil:  $[\alpha]^{20}_D -33.2$  (*c* 0.5, CHCl<sub>3</sub>); <sup>1</sup>H NMR (CDCl<sub>3</sub>, 400 MHz)  $\delta$  3.64–3.52 (m, 2H), 2.94–2.80 (m, 3H), 2.27–2.22 (m, 1H), 2.14 (s, 3H), 1.85–1.63 (m, 3H), 1.60–1.37 (m, 7H), 1.31–1.18 (m, 6H), 0.846 (t, *J* = 6.72 Hz, 3H); <sup>13</sup>C NMR (CDCl<sub>3</sub>, 100 MHz)  $\delta$  213.3, 74.7, 61.0, 52.2, 46.3, 34.6, 33.1, 31.3, 29.9, 28.2, 25.1, 24.5, 24.1, 22.9, 22.7, 14.1; IR (neat, cm<sup>-1</sup>)  $\nu_{\max}$  2932, 2860, 1702, 1461, 1348, 1158, 1141, 1091, 1055; HRMS (FAB) calcd. for C<sub>16</sub>H<sub>30</sub>NO<sub>2</sub> ([M+H]<sup>+</sup>) 268.2277, found 268.2287.

**(5*R*,7*aR*,11*aS*)-5-butyl-2,3,6,7,7*a*,8-hexahydro-1*H*-pyrrolo[2,1-*j*]quinolin-11(5*H*)-one (**20**)**

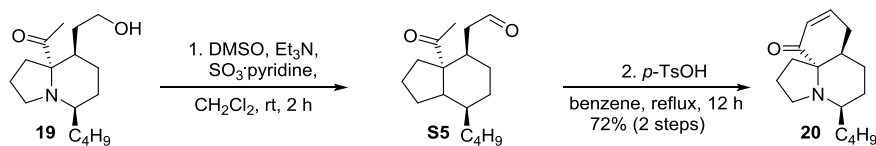

To a solution of **19** (120 mg, 0.449 mmol) in CH<sub>2</sub>Cl<sub>2</sub> (9 mL) were added DMSO (0.700 mL, 9.86 mmol), SO<sub>3</sub>.pyridine (547 mg, 3.36 mmol) and Et<sub>3</sub>N (0.940 mL, 6.74 mmol) at 0 °C, and the resulting mixture was stirred for 2 h at room temperature. The reaction was quenched by the slow addition of a saturated NaHCO<sub>3</sub> aqueous solution, water and brine at 0 °C and the mixture was extracted once with EtOAc. The organic layer was dried over MgSO<sub>4</sub> and concentrated in vacuo to afford **S5** as a brown oil, which was used in the subsequent step without further purification.

To a solution of crude **S5** in dry benzene (6 mL) was added *p*-TsOH (77.0 mg, 0.449 mmol) at room temperature. The reaction mixture was heated to reflux under a Dean-Stark trap for 12 h. The reaction mixture was then allowed to cool to room temperature, and the solvent was removed under reduced pressure. The residue was diluted with CH<sub>2</sub>Cl<sub>2</sub> and washed with saturated NaHCO<sub>3</sub> aqueous solution and water. The organic layer was dried over MgSO<sub>4</sub> and concentrated in vacuo. The residue was purified by flash column chromatography on silica gel (CH<sub>2</sub>Cl<sub>2</sub>/MeOH, 5:1) to afford **20** (80.0 mg, 72%) as a light brown oil: [ $\alpha$ ]<sub>D</sub><sup>20</sup> -77.7 (*c* 0.5, CHCl<sub>3</sub>); <sup>1</sup>H NMR (CDCl<sub>3</sub>, 500 MHz)  $\delta$  6.74 (ddd, *J* = 9.98 Hz, 5.62 Hz, 2.02 Hz, 1H), 5.89 (dd, *J* = 10.0 Hz, 2.36 Hz, 1H), 3.03 (t, *J* = 7.24 Hz, 1H), 2.86 (s, 1H), 2.70 (ddd, *J* = 12.1 Hz, 7.72 Hz, 4.96 Hz, 1H), 2.34–2.31 (m, 1H), 2.21 (td, *J* = 19.0 Hz, 4.48 Hz, 1H), 2.11–2.01 (m, 1H), 1.97 (td, *J* = 12.9 Hz, 6.72 Hz, 1H), 1.71–1.56 (m, 4H), 1.54–1.48 (m, 3H), 1.28–1.21 (m, 6H), 0.83 (t, *J* = 8.48 Hz, 3H); <sup>13</sup>C NMR (CDCl<sub>3</sub>, 200 MHz)  $\delta$  203.0, 147.0, 128.4, 71.2, 51.3, 47.3, 35.8, 34.5, 31.7, 29.0, 28.5, 22.8, 22.6, 22.3, 21.1, 14.0; IR (neat, cm<sup>-1</sup>)  $\nu_{\text{max}}$  2932, 2862, 1692, 1461, 1380, 1148; HRMS (FAB) calcd. for C<sub>16</sub>H<sub>26</sub>NO ([M+H]<sup>+</sup>) 248.2014, found 248.2012.

**(5*R*,7*aS*,11*aS*)-5-butyloctahydro-1*H*-pyrrolo[2,1-*j*]quinolin-11(5*H*)-one (21)**

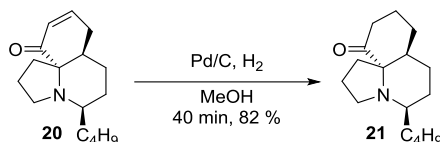

To a solution of **20** (40.0 mg, 0.162 mmol) in MeOH (1.5 mL) was added HCl 2.0 M in ether solution (2.0 mL) at 0 °C, and the resulting mixture was stirred for 15 min at room temperature. The mixture was evaporated to dryness in vacuo to yield HCl salt of **20** as a light brown oil. To a solution of HCl salt of **20** was added 10% Pd/C (40.0 mg, 100% wt. of **20**). The flask was evacuated, filled with H<sub>2</sub>, and stirred at room temperature for 40 min. The mixture was then filtered through Celite, and the filtrate was concentrated. The residue was diluted with CH<sub>2</sub>Cl<sub>2</sub> and washed with saturated NaHCO<sub>3</sub> aqueous solution and water. The organic layer was dried over MgSO<sub>4</sub> and concentrated in vacuo. The residue was purified by flash column chromatography on silica gel (CH<sub>2</sub>Cl<sub>2</sub>/MeOH, 7:1) to afford the **21** (33.0 mg, 82%) as a brown oil: [ $\alpha$ ]<sub>D</sub><sup>20</sup> -33.1 (*c* 0.5, CHCl<sub>3</sub>); <sup>1</sup>H NMR (CDCl<sub>3</sub>, 800

MHz)  $\delta$  2.99 (t,  $J$  = 7.68 Hz, 1H), 2.88–2.87 (m, 1H), 2.68 (ddd,  $J$  = 11.8 Hz, 8.44 Hz, 5.40 Hz, 1H), 2.59 (ddd,  $J$  = 15.1 Hz, 12.9 Hz, 7.42 Hz, 1H), 2.39–2.36 (m, 1H), 1.97–1.88 (m, 4H), 1.71–1.64 (m, 3H), 1.59–1.55 (m, 2H), 1.54–1.46 (m, 4H), 1.30–1.24 (m, 4H), 1.23–1.20 (m, 2H), 0.86 (t,  $J$  = 7.00 Hz, 3H);  $^{13}\text{C}$  NMR ( $\text{CDCl}_3$ , 200 MHz)  $\delta$  212.0, 75.1, 51.6, 46.8, 39.3, 38.2, 34.4, 31.3, 29.1, 28.4, 25.6, 23.0, 22.89, 22.86, 21.7, 14.1; IR (neat,  $\text{cm}^{-1}$ )  $\nu_{\text{max}}$  3414, 2955, 2934, 2869, 1715, 1642, 1460, 1180, 1122, 1034, 1012, 684, 657; HRMS (FAB) calcd. for  $\text{C}_{16}\text{H}_{28}\text{NO}$  ( $[\text{M}+\text{H}]^+$ ) 250.2171, found 250.2179.

### Lepadiformine C (**1**)

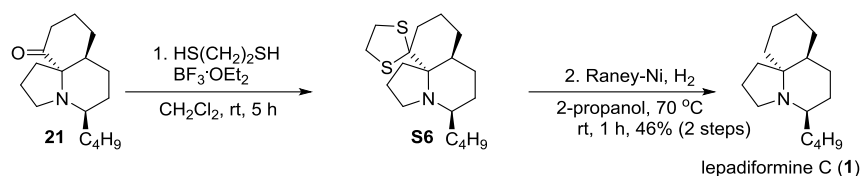

To a solution of **21** (30.0 mg, 0.120 mmol) in  $\text{CH}_2\text{Cl}_2$  (0.1 mL) were added 1,2-ethanedithiol (0.154 mL, 1.80 mmol) and  $\text{BF}_3 \cdot \text{OEt}_2$  (0.178 mL, 1.44 mmol) at 0 °C, and the resulting mixture was stirred for 5 h at room temperature. The mixture was diluted with toluene and evaporated to dryness in vacuo. The mixture was filtered through a short pad of silica using  $\text{CH}_2\text{Cl}_2$ , and the filtrate was concentrated in vacuo to afford **S6** as a yellow oil, which was used in the subsequent step without further purification.

To a solution of **S6** was added Raney-Nickel (0.8 mL). The flask was evacuated, filled with  $\text{H}_2$ , and stirred at 70 °C for 1 h. The mixture was then filtered through PTFE filter, and the filtrate was concentrated and purified by flash column chromatography on silica gel ( $\text{CH}_2\text{Cl}_2/\text{MeOH}$ , 7:1) to yield lepadiformine C (**1**) (13.0 mg, 46%) as a colorless oil. The free base **1** was dissolved in MeOH (0.5 mL). To this solution was added HCl 2.0 M in ether solution (2 mL) at 0 °C, and the resulting mixture was stirred for 20 min at room temperature. The solution was then evaporated to dryness in vacuo to afford **1**·HCl as a white gum. The spectral data matched those previously reported in the literature:  $[\alpha]_{\text{D}}^{20}$  -10.7 ( $c$  0.3,  $\text{CHCl}_3$ );  $^1\text{H}$  NMR ( $\text{CDCl}_3$ , 600 MHz)  $\delta$  3.67 (td,  $J$  = 11.4 Hz, 5.96 Hz, 1H), 3.52–3.49 (m, 1H), 2.85 (ddd,  $J$  = 18.3 Hz, 11.7 Hz, 6.65 Hz, 1H), 2.43–2.40 (m, 1H), 2.20 (d,  $J$  = 13.7 Hz,

1H), 2.11–2.06 (m, 1H), 2.05–1.91 (m, 5H), 1.86–1.84 (m, 1H), 1.75–1.72 (m, 1H), 1.69–1.63 (m, 2H), 1.60–1.46 (m, 2H), 1.41–1.20 (m, 8H), 1.20–1.04 (m, 1H), 0.88 (t,  $J = 7.11$  Hz, 3H);  $^{13}\text{C}$  NMR ( $\text{CDCl}_3$ , 150 MHz)  $\delta$  74.8, 55.4, 47.0, 37.8, 35.5, 30.8, 29.9, 28.4, 27.7, 25.2, 23.8, 22.4, 22.4, 20.9, 20.0, 13.9; IR (neat,  $\text{cm}^{-1}$ )  $\nu_{\text{max}}$  2935, 2866, 2708, 2631, 2579, 2524, 2490, 1467, 1449, 1347; HRMS (FAB) calcd. for  $\text{C}_{16}\text{H}_{30}\text{N}$  ( $[\text{M}+\text{H}]^+$ ) 236.2378, found 236.2377.

## D. Computational study

### General procedure for molecular energy calculations

Computational energy minimization was performed on system of **13** using the DMol3 program<sup>2</sup> in Material Studio 2017 (Accelrys software, Inc., San Diego, CA). A generalized gradient approximation (GGA) for the Perdew, Burke and Ernzerhof (PBE)<sup>3</sup> exchange-correlation function was applied with double-numerical plus d-functions polarization (DNP), as implemented in DMol3. All molecules were modeled in the gas phase.

### Geometry optimization and energy minimization of the compounds

The compounds were calculated to compare their energy levels using the method described above. This computational energy minimization demonstrated that *cis*-**S7** is thermodynamically more stable than *trans*-**S7**. The energy differences are 0.85 kcal/mol.

**Table S2.** Molecular energies of **S7**.

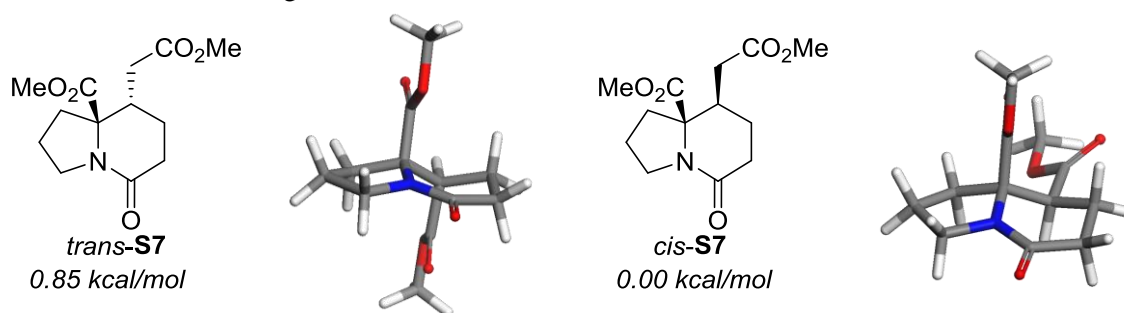

| compound                 | Hartree (Ha) <sup>a</sup> | kcal/mol     | Relative energy (kcal/mol) |
|--------------------------|---------------------------|--------------|----------------------------|
| <i>trans</i> - <b>S7</b> | -897.7160481              | -563325.2506 | 0.8527                     |
| <i>cis</i> - <b>S7</b>   | -897.717407               | -563326.1034 | 0                          |

<sup>a</sup>1Ha = 627.509391 kcal/mol.

2 (a) Delley, B. *J. Chem. Phys.* **1990**, 92, 508. (b) Delley, B. *J. Chem. Phys.* **2000**, 113, 7756.  
3 Perdew, J. P.; Burke K.; Ernzerhof, M. *Phys. Rev. Lett.* **1996**, 77, 3865.

## Calculation input

All calculations are performed under following conditions.

### # Task parameters

|                              |               |
|------------------------------|---------------|
| Calculate                    | optimize      |
| Opt_energy_convergence       | 1.0000e-005   |
| Opt_gradient_convergence     | 2.0000e-003 A |
| Opt_displacement_convergence | 5.0000e-003 A |
| Opt_iterations               | 50            |
| Opt_max_displacement         | 0.3000 A      |
| Initial_hessian              | improved      |
| Scf_density_convergence      | 1.0000e-006   |
| Scf_charge_mixing            | 2.0000e-001   |
| Scf_diis                     | 6 pulay       |
| Scf_iterations               | 50            |

### # Electronic parameters

|                   |                 |
|-------------------|-----------------|
| Spin_polarization | restricted      |
| Charge            | 0               |
| Basis             | dnp             |
| Pseudopotential   | none            |
| Functional        | pbe             |
| Aux_density       | hexadecapole    |
| Integration_grid  | fine            |
| Occupation        | fermi           |
| Cutoff_Global     | 3.7000 angstrom |

### # Calculated properties

## Calculation output

### *trans*-S7

| Atom | X        | Y        | Z        | Atom | X        | Y        | Z        |
|------|----------|----------|----------|------|----------|----------|----------|
| C    | 17.42437 | -9.30988 | 15.04145 | H    | 19.63313 | -12.8365 | 16.19837 |
| C    | 16.83511 | -10.1331 | 13.88153 | H    | 17.90105 | -14.3736 | 15.50367 |
| N    | 17.27417 | -11.5079 | 14.14083 | H    | 19.35119 | -14.7681 | 14.58815 |
| C    | 18.03841 | -11.6579 | 15.3721  | H    | 17.0592  | -14.6212 | 13.25905 |
| C    | 18.49242 | -10.2066 | 15.69173 | H    | 18.4724  | -13.8674 | 12.53692 |
| C    | 19.18986 | -12.6804 | 15.20679 | O    | 15.8876  | -12.3721 | 16.23664 |
| C    | 18.56926 | -14.0041 | 14.71053 | O    | 17.62482 | -12.2836 | 17.6981  |
| C    | 17.79216 | -13.8149 | 13.39923 | C    | 15.04909 | -12.8033 | 17.33767 |
| C    | 17.0556  | -12.4912 | 13.20971 | H    | 15.02925 | -12.0362 | 18.12255 |
| O    | 16.35774 | -12.2859 | 12.21394 | H    | 15.43008 | -13.7402 | 17.76251 |
| H    | 16.63614 | -9.06756 | 15.7692  | O    | 20.16244 | -11.8362 | 13.1233  |
| H    | 17.84677 | -8.3591  | 14.69465 | O    | 21.49614 | -12.2308 | 14.92271 |
| H    | 15.73847 | -10.0773 | 13.8377  | C    | 22.62363 | -11.829  | 14.10728 |
| H    | 17.21703 | -9.82458 | 12.89712 | H    | 14.05592 | -12.9467 | 16.90283 |
| C    | 17.17794 | -12.142  | 16.5731  | H    | 23.49997 | -11.9365 | 14.75405 |
| H    | 19.46836 | -10.0325 | 15.21712 | H    | 22.5062  | -10.7883 | 13.78026 |
| H    | 18.611   | -10.0503 | 16.77033 | H    | 22.70676 | -12.4749 | 13.22415 |
| C    | 20.29082 | -12.192  | 14.28051 |      |          |          |          |

Total energy = -897.7160481 Ha

### *cis*-S7

| Atom | X        | Y        | Z        | Atom | X        | Y        | Z        |
|------|----------|----------|----------|------|----------|----------|----------|
| C    | 16.10405 | -12.9753 | 17.00904 | H    | 19.81128 | -14.0222 | 17.18356 |
| C    | 16.12808 | -14.5106 | 16.91829 | H    | 19.54602 | -15.3689 | 19.93848 |
| N    | 17.33289 | -14.9094 | 17.65763 | H    | 20.95075 | -15.538  | 18.90515 |
| C    | 18.01074 | -13.7862 | 18.30757 | H    | 19.13484 | -17.4319 | 18.68565 |
| C    | 17.50272 | -12.5635 | 17.50058 | H    | 19.74349 | -16.7357 | 17.19517 |
| C    | 19.55026 | -14.0181 | 18.25451 | O    | 16.765   | -14.5778 | 20.23374 |
| C    | 19.86432 | -15.378  | 18.88566 | O    | 17.91886 | -12.6319 | 20.45202 |
| C    | 19.17181 | -16.4985 | 18.1082  | C    | 16.34139 | -14.4241 | 21.61247 |
| C    | 17.75969 | -16.2139 | 17.61353 | H    | 17.21288 | -14.42   | 22.27788 |
| O    | 17.06959 | -17.0923 | 17.08992 | H    | 15.69941 | -15.2866 | 21.81255 |
| H    | 15.33886 | -12.6507 | 17.7301  | O    | 21.02806 | -13.0522 | 19.93328 |
| H    | 15.8566  | -12.5105 | 16.04678 | O    | 20.33603 | -11.7655 | 18.19083 |
| H    | 15.23375 | -14.9736 | 17.35963 | C    | 21.05562 | -10.66   | 18.78916 |
| H    | 16.20935 | -14.8865 | 15.8879  | H    | 15.78885 | -13.4844 | 21.73867 |
| C    | 17.57632 | -13.5925 | 19.78524 | H    | 20.60857 | -10.4045 | 19.75781 |
| H    | 18.18346 | -12.4107 | 16.65181 | H    | 20.95391 | -9.83077 | 18.08217 |
| H    | 17.51269 | -11.6499 | 18.10256 | H    | 22.11017 | -10.9234 | 18.93584 |
| C    | 20.37405 | -12.9158 | 18.91796 |      |          |          |          |

Total energy = -897.717407 Ha

## E. Chiral HPLC chromatograms of S2

Using **S2**, we determined enantiomeric excess by chiral HPLC (see Table 1 in the main text). The chromatograms were compared with the chromatogram obtained from *rac*-**S2**, which was prepared from DL-proline.

HPLC conditions : CHIRALCEL OD-H (0.46 × 25 cm, 5 μm), hexane/2-propanol = 96:4, flow rate 1.0 mL/min, λ = 270 nm.

Ref. *rac*-**S2**

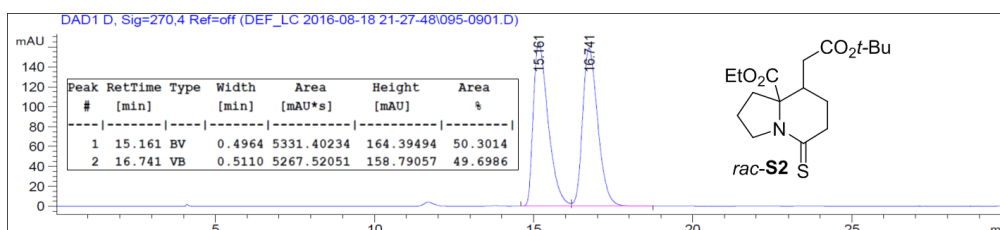

Table 1 (entry 1, NaO<sup>t</sup>Bu (1.1 equiv), rt, 10 min)

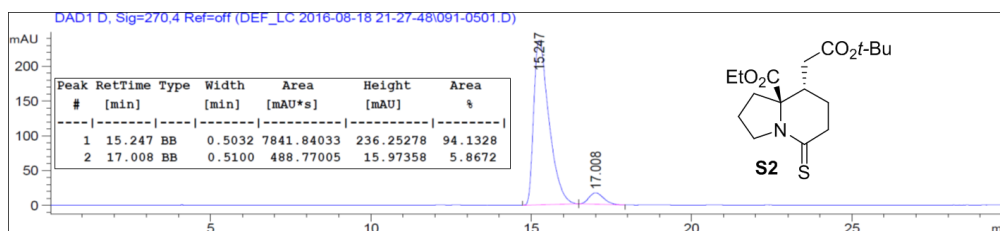

Table 1 (entry 2, KO<sup>t</sup>Bu (1.1 equiv), rt, 3 h)

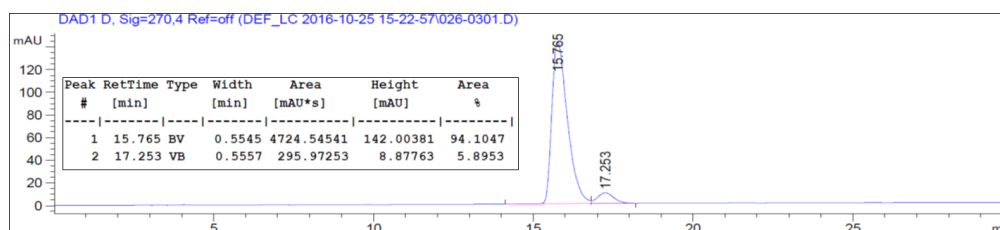

Table 1 (entry 4, NaO<sup>t</sup>Bu (3 equiv), rt, 10 min)

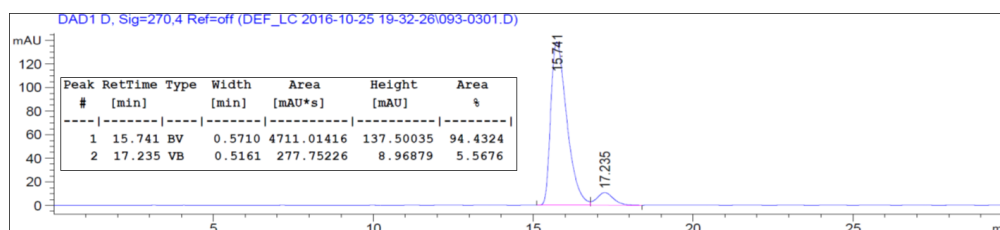

Table 1 (entry 5, NaO'Bu (0.5equiv), rt, 2 h)

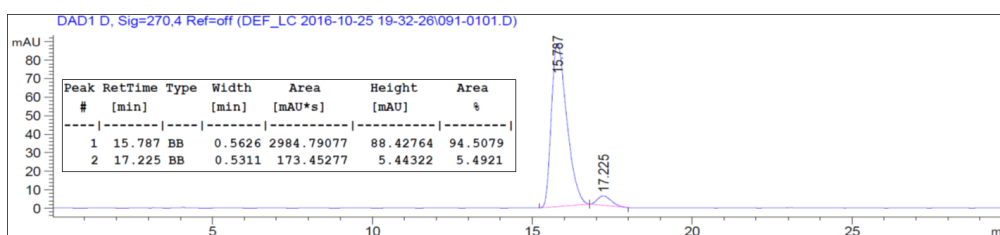

Table 1 (entry 6, NaO'Bu (1.1equiv), 0 °C, 2 h)

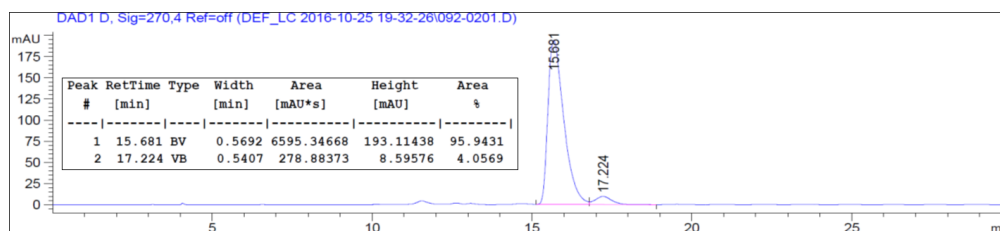

Table 1 (entry 7, NaO'Bu (1.1equiv), -20 °C, 12 h)

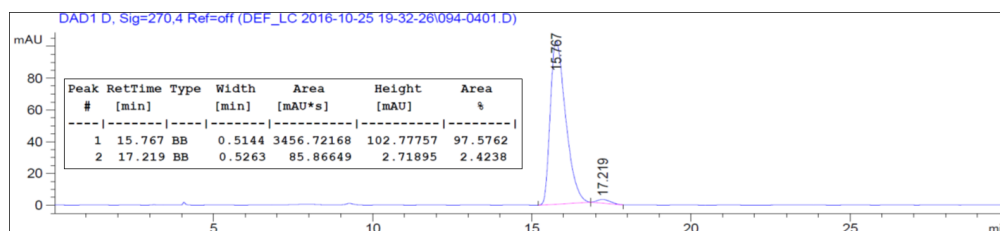

Table 1 (entry 8, NaO'Bu (1.1equiv), -40 °C, 72 h)

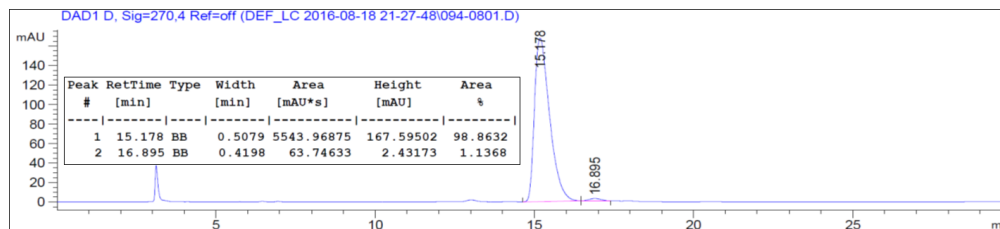

Table 1 (entry 9, NaOEt (1.1equiv), rt, 12 h)

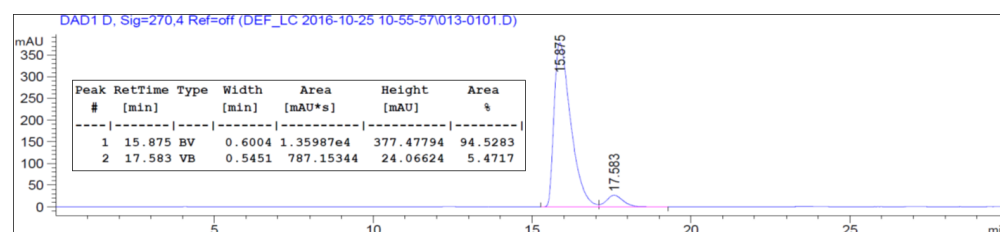

Table 1 (entry 10, NaHMDS (3 equiv), -78 °C, 1 h)

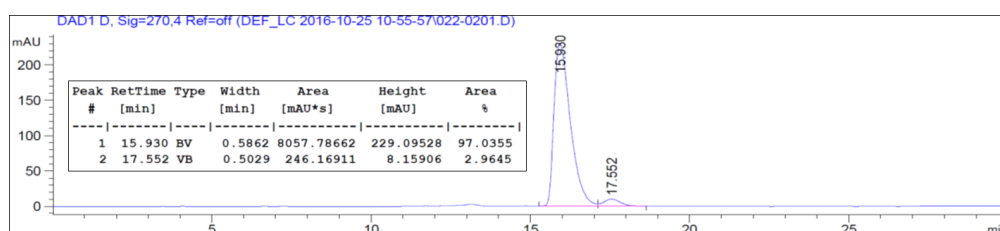

## E. Copies of spectra

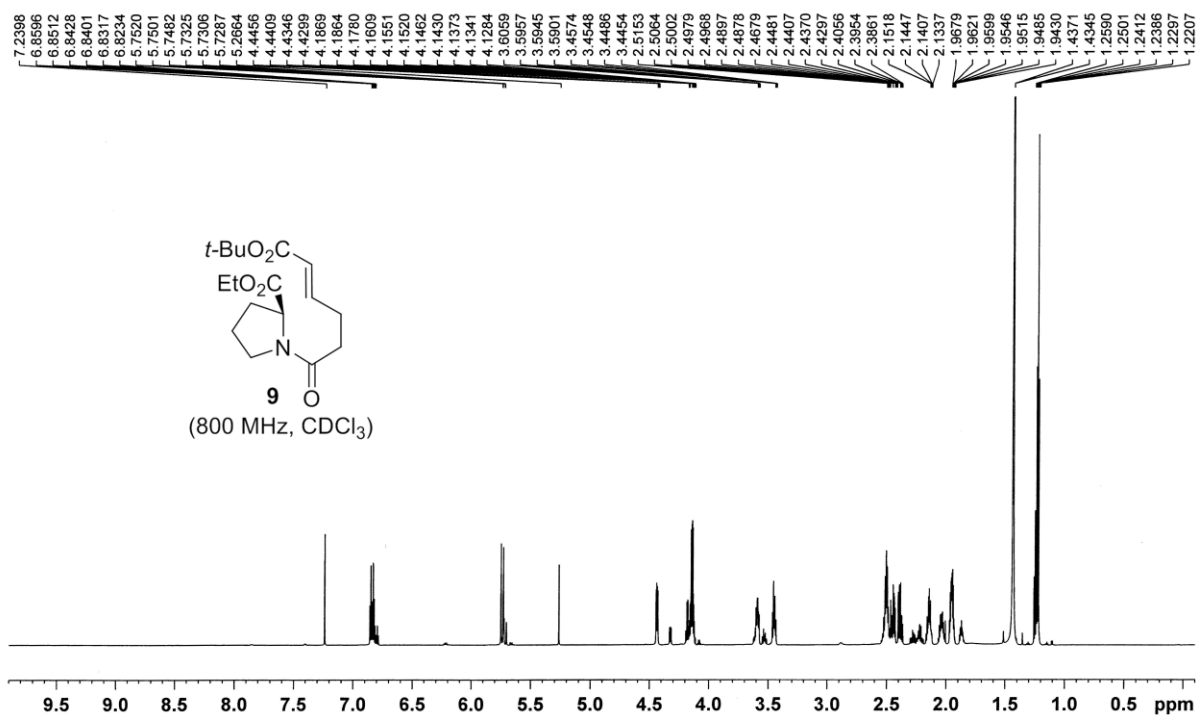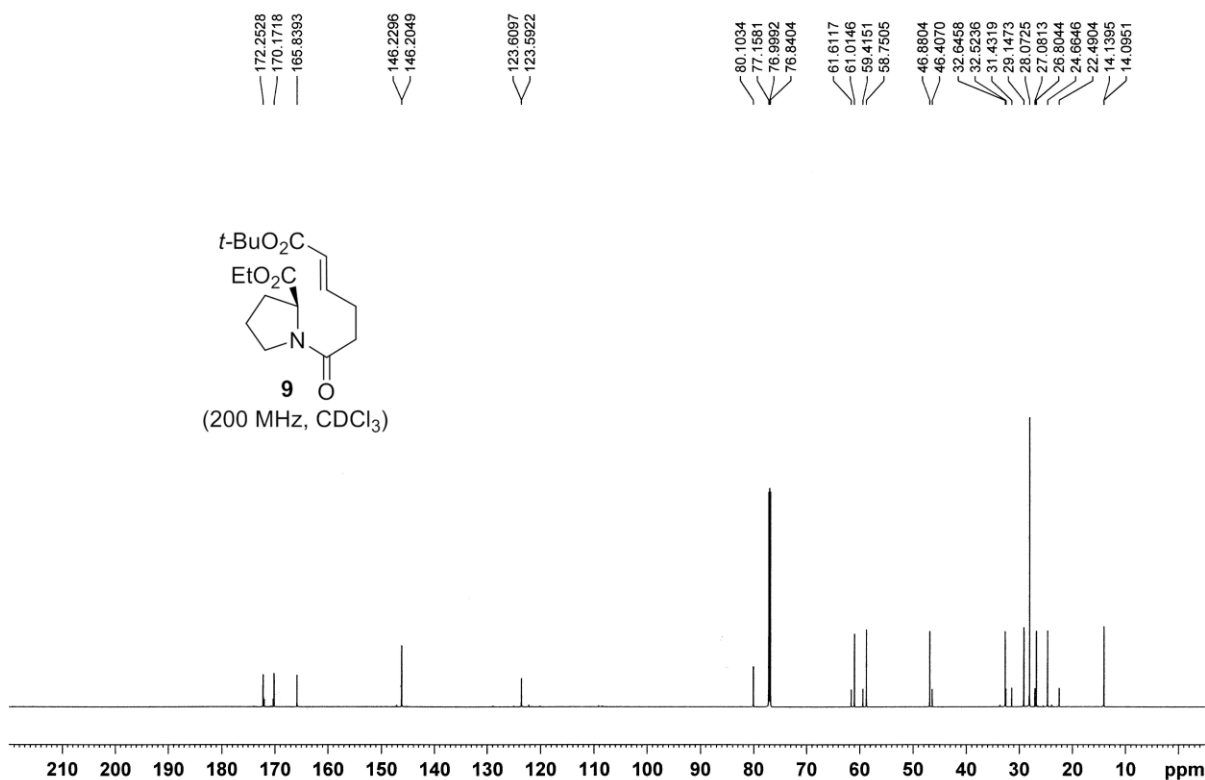

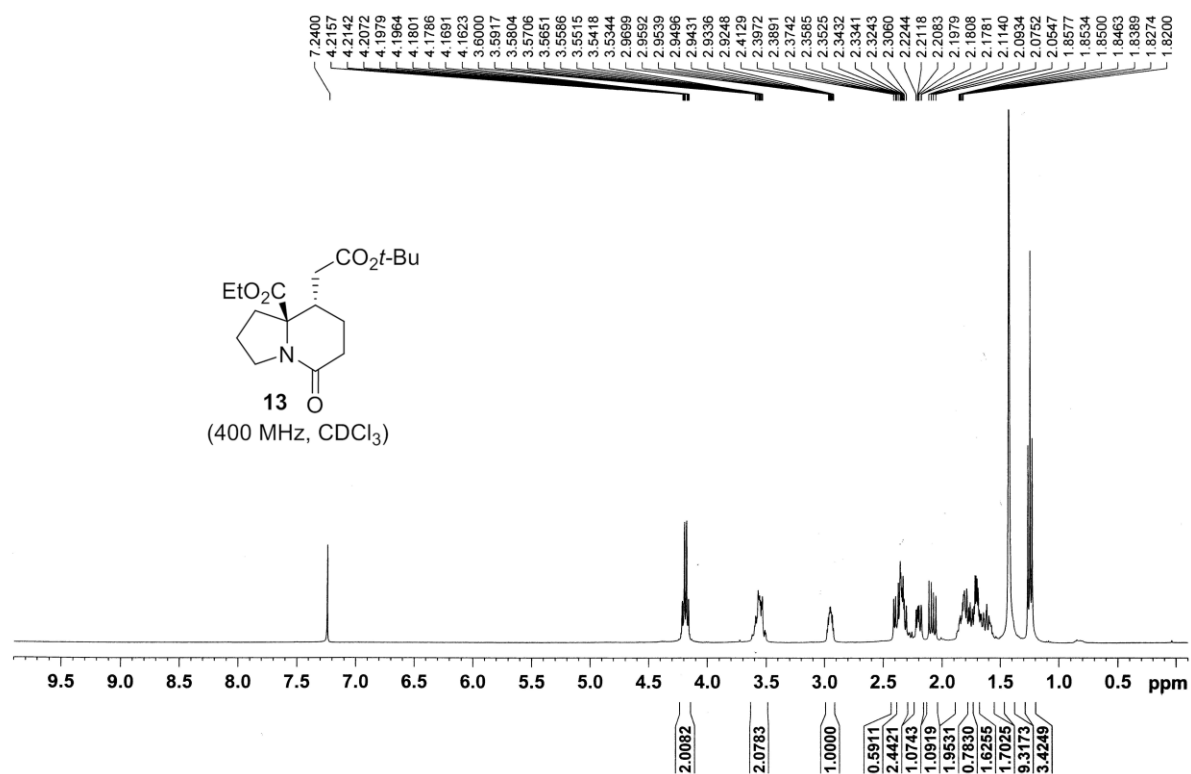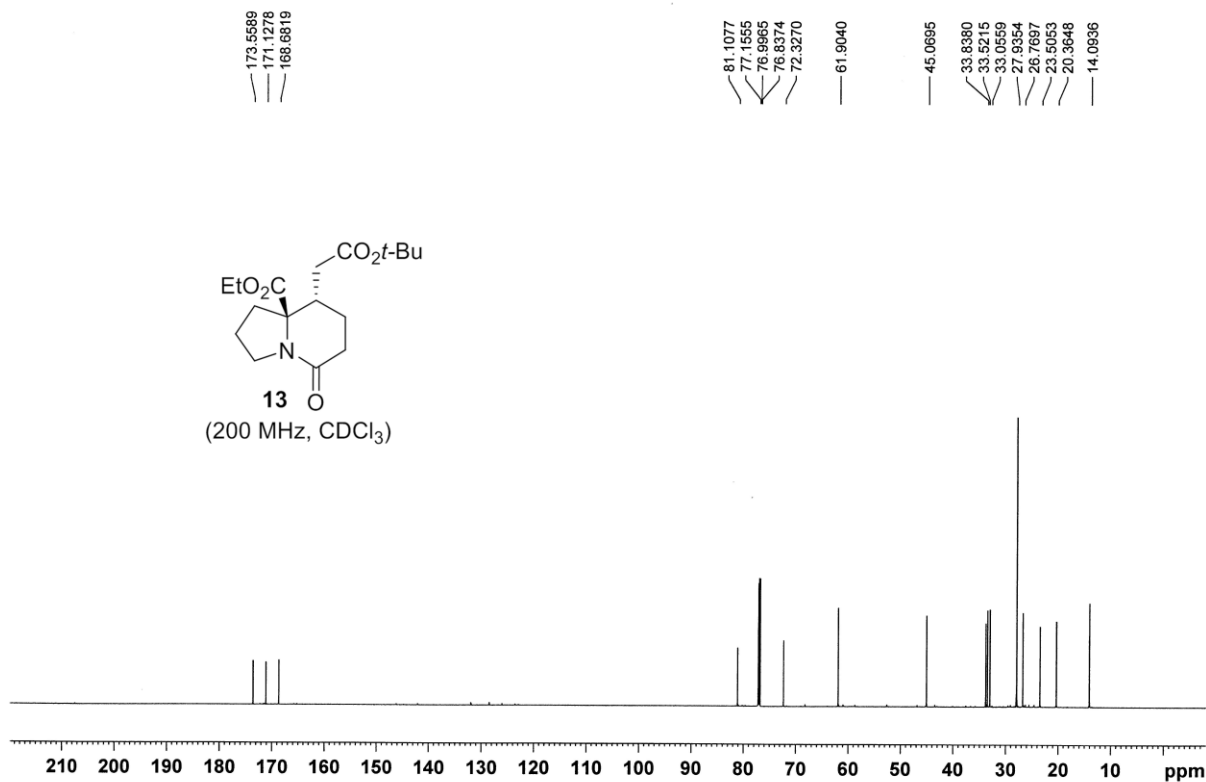

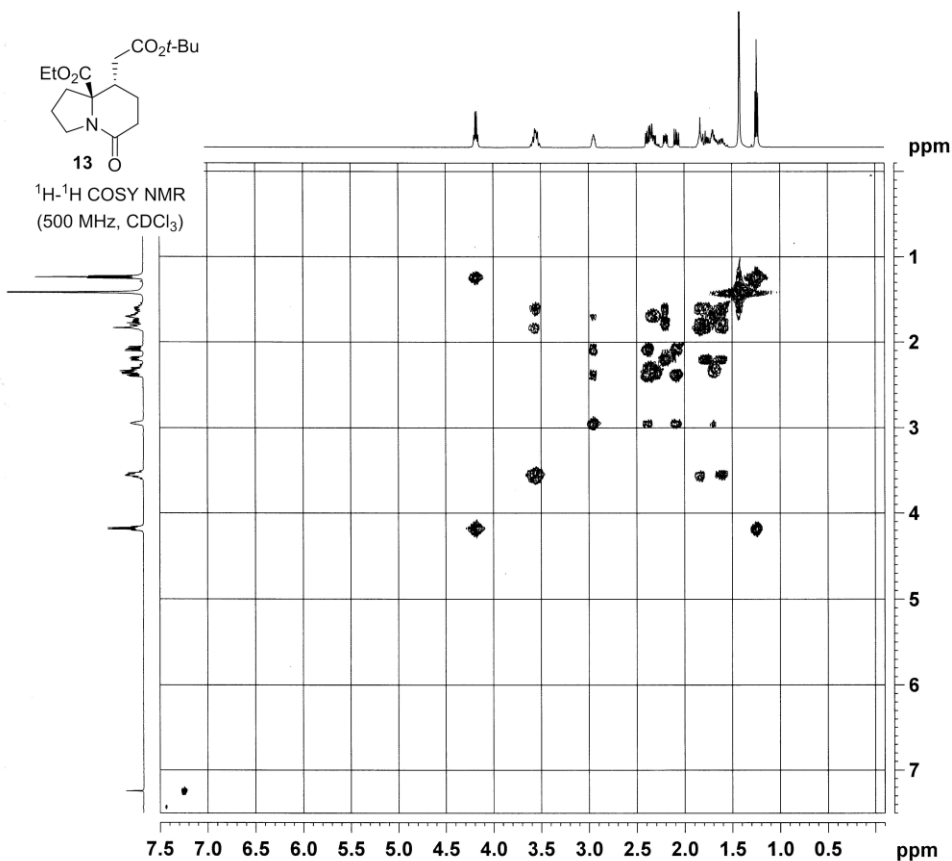

```

Current Data Parameters
NAME      KSHee-A
EXPNO     11
PROCNO    1

F2 - Acquisition Parameters
Date_     20161025
Time      0.11
INSTRUM   spect
PROBHD    5 mm TXI 13C/1
PULPROG   zgpg30
TD         65536
SOLVENT   CDCl3
NS         16
DS         16
SWH        7002.801 Hz
FIDRES     0.1463486 sec
AQ          0.1463486 sec
RG          655.36
DW          71.400 usec
DE          6.50 usec
TE          296.7 K
DO         0.00000000 sec
D1          1.48689198 sec
D11         0.00000000 sec
D16         0.00020000 sec
INO        0.00014280 sec

===== CHANNEL f1 =====
NUC1       1H
P1         10.00 usec
PL1        1.80 dB
SFO1       500.1324849 MHz

===== GRADIENT CHANNEL =====
GPNAM1     SINE.100
GPNAM2     SINE.100
GPX1       0.00 %
GPX2       0.00 %
GPY1       0.00 %
GPY2       0.00 %
GPZ1       10.00 %
GPZ2       10.00 %
P16        1000.00 usec

F1 - Acquisition parameters
ND0        256
TD          65536
SFO1       500.1325 MHz
FIDRES     27.354692 Hz
SW         14.002 ppm
FMODE      QF

F2 - Processing parameters
SI          2048
SF          500.1300183 MHz
WDW         SINE
SSB         0
LB          0.00 Hz
GB          0
PC          1.00

F1 - Processing parameters
SI          512
MC2         QF
SF          500.1300187 MHz
WDW         SINE
SSB         0
LB          0.00 Hz
GB          0

```

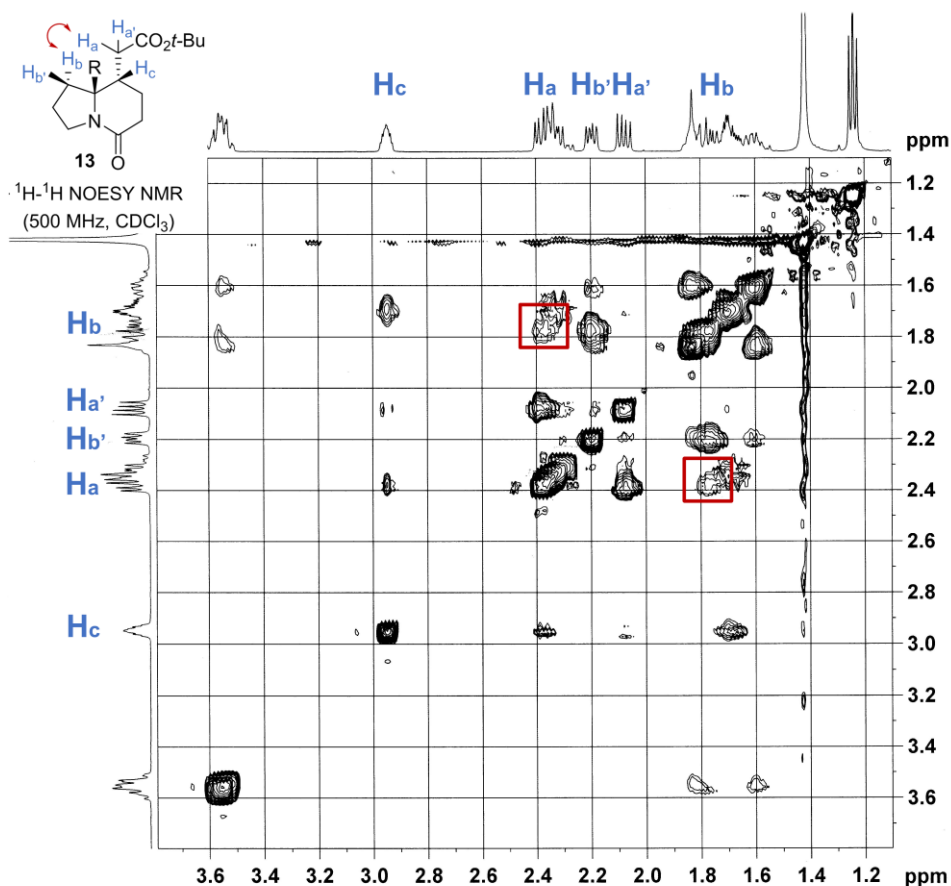

```

Current Data Parameters
NAME      KSHee-A
EXPNO     14
PROCNO    1

F2 - Acquisition Parameters
Date_     20161024
Time      20.49
INSTRUM   spect
PROBHD    5 mm TXI 13C/1
PULPROG   noesygpgph
TD         65536
SOLVENT   CDCl3
NS         16
DS         16
SWH        7002.801 Hz
FIDRES     3.419337 Hz
AQ          0.1463486 sec
RG          655.36
DW          71.400 usec
DE          6.50 usec
TE          296.7 K
DO         0.00005829 sec
D1          2.00000000 sec
D8          0.80000001 sec
D16         0.00020000 sec
INO        0.00014280 sec
ST1CNT     128
TAU        0.39880002 sec

===== CHANNEL f1 =====
NUC1       1H
P1         10.30 usec
P2         20.00 usec
PL1        1.80 dB
SFO1       500.1324849 MHz

===== GRADIENT CHANNEL =====
GPNAM1     SINE.100
GPNAM2     SINE.100
GPX1       0.00 %
GPX2       0.00 %
GPY1       0.00 %
GPY2       0.00 %
GPZ1       20.00 %
GPZ2       20.00 %
P16        1000.00 usec

F1 - Acquisition parameters
ND0        1
TD          256
SFO1       500.13125 MHz
FIDRES     27.354692 Hz
SW         14.002 ppm
FMODE      States-TPPI

F2 - Processing parameters
SI          1024
SF          500.1300236 MHz
WDW         QSINE
SSB         2
LB          0.00 Hz
GB          0
PC          1.00

F1 - Processing parameters
SI          1024
MC2         States-TPPI
SF          500.1300208 MHz
WDW         QSINE
SSB         2
LB          0.00 Hz
GB          0

```

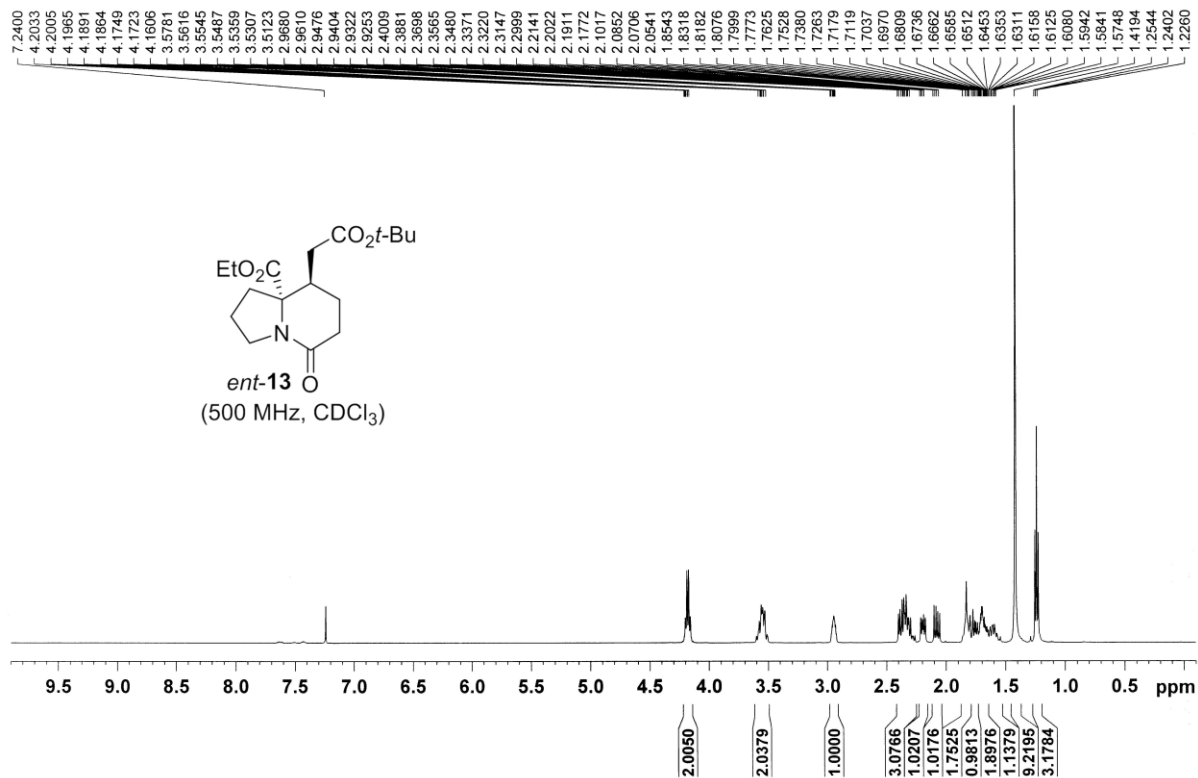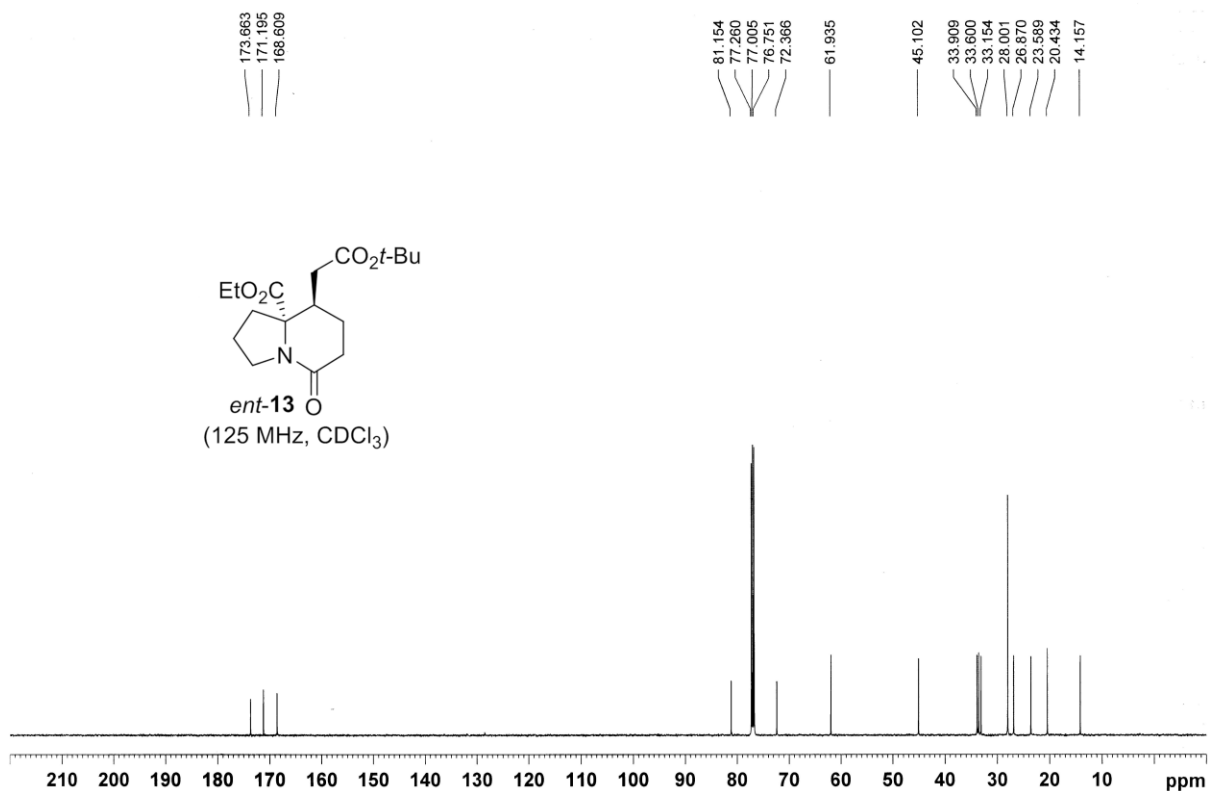



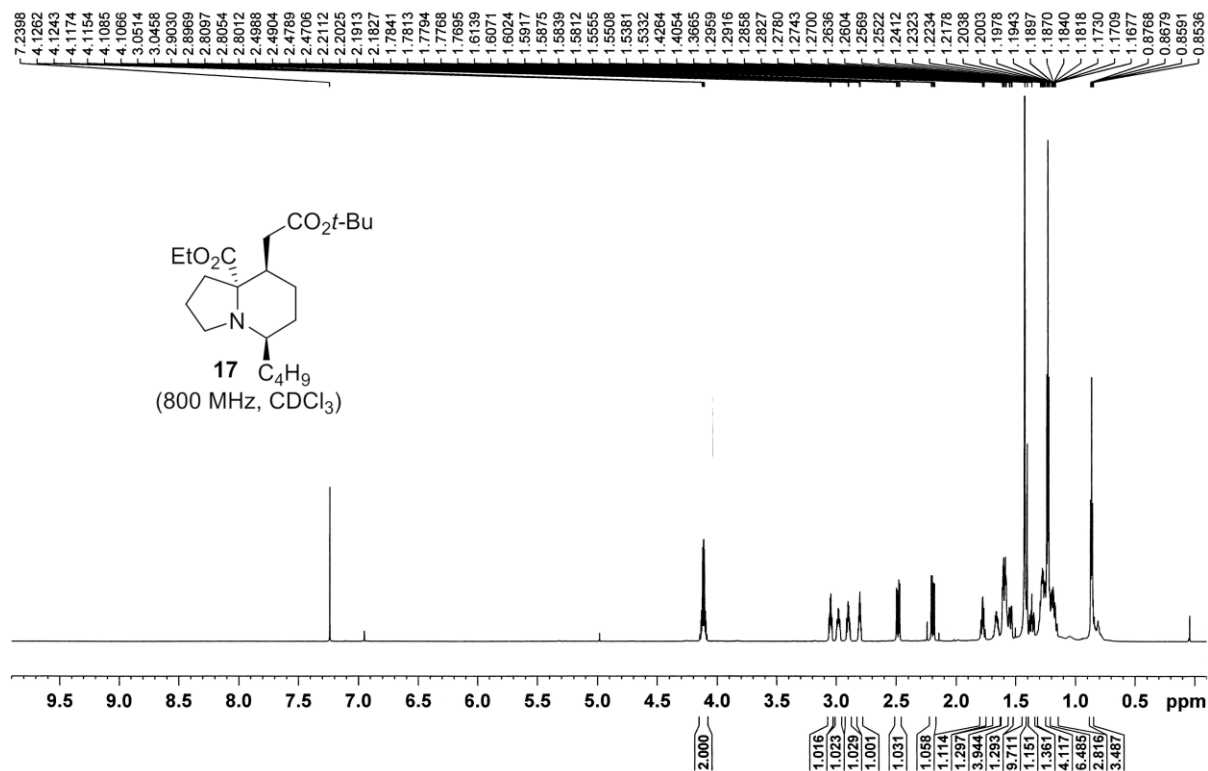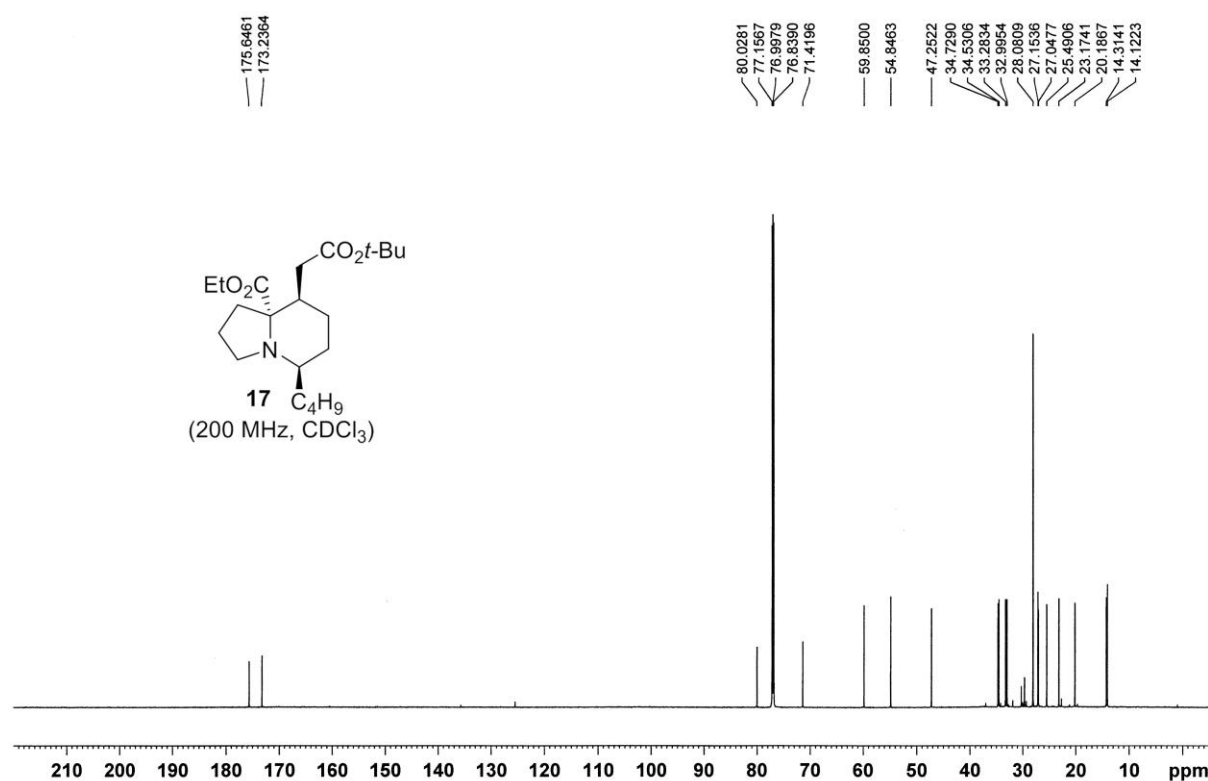

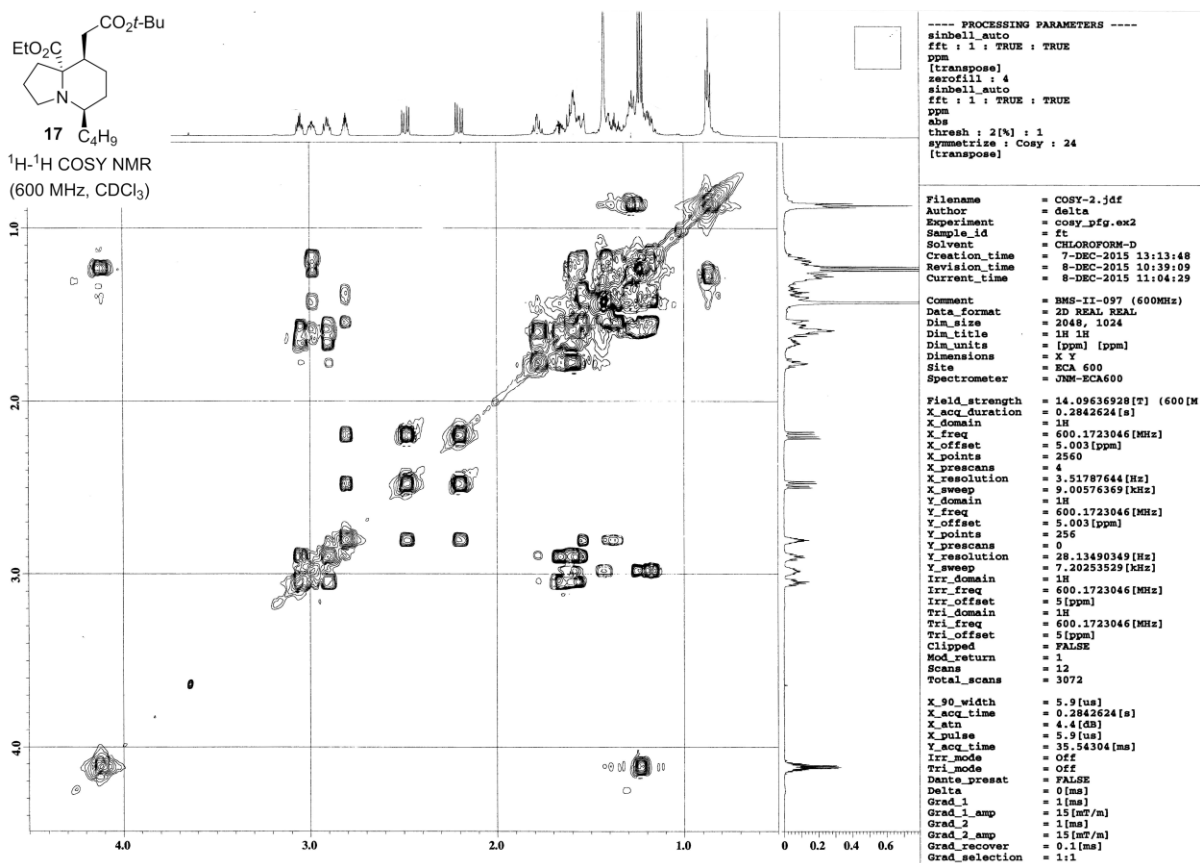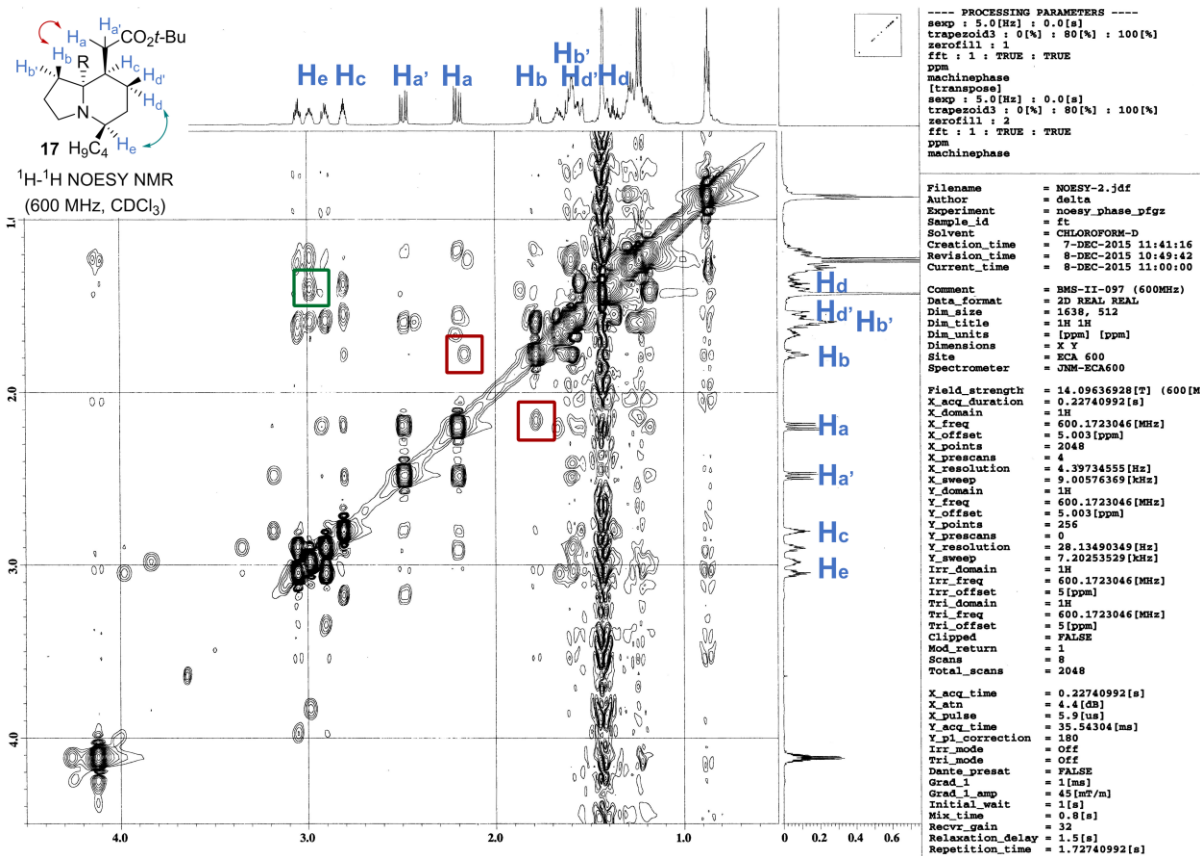

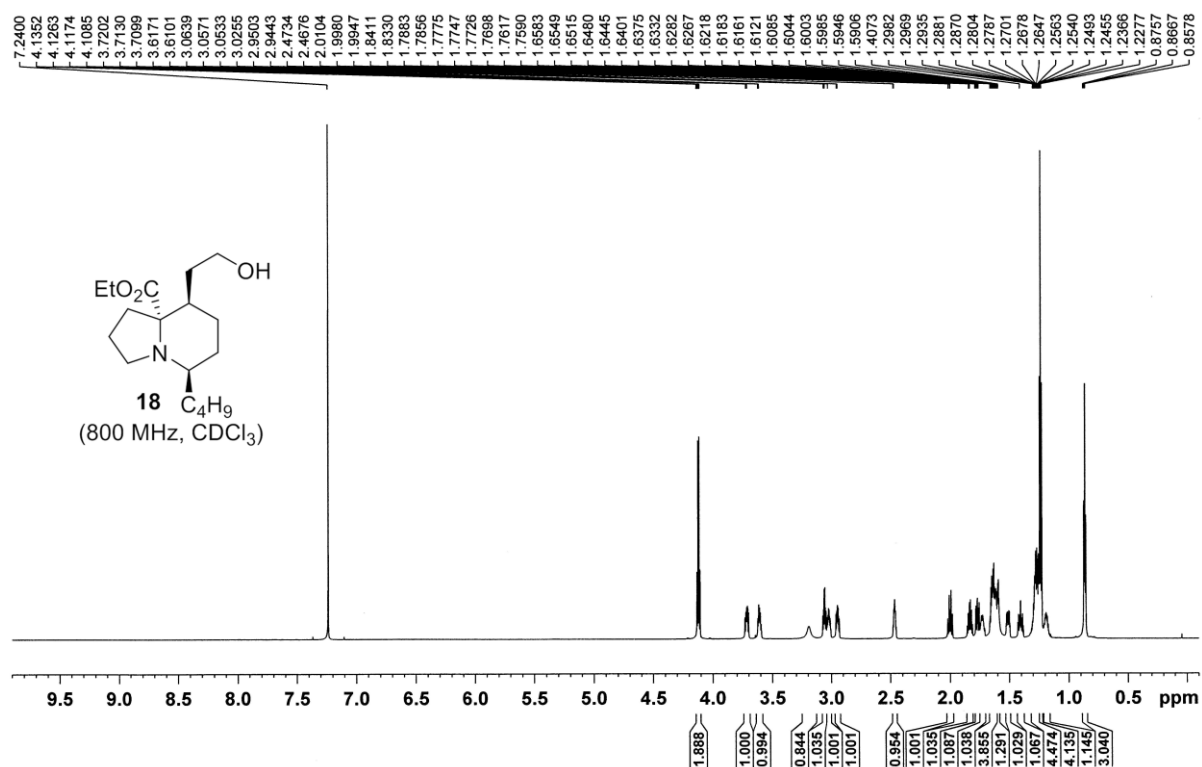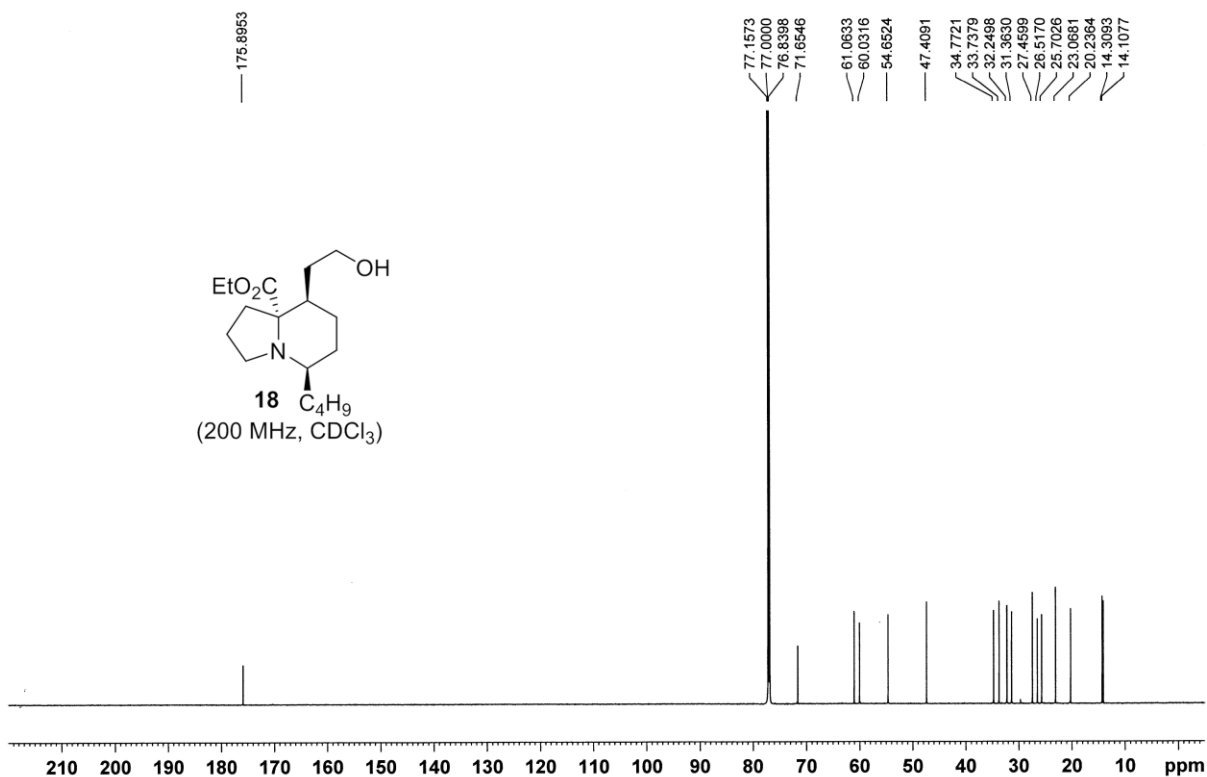

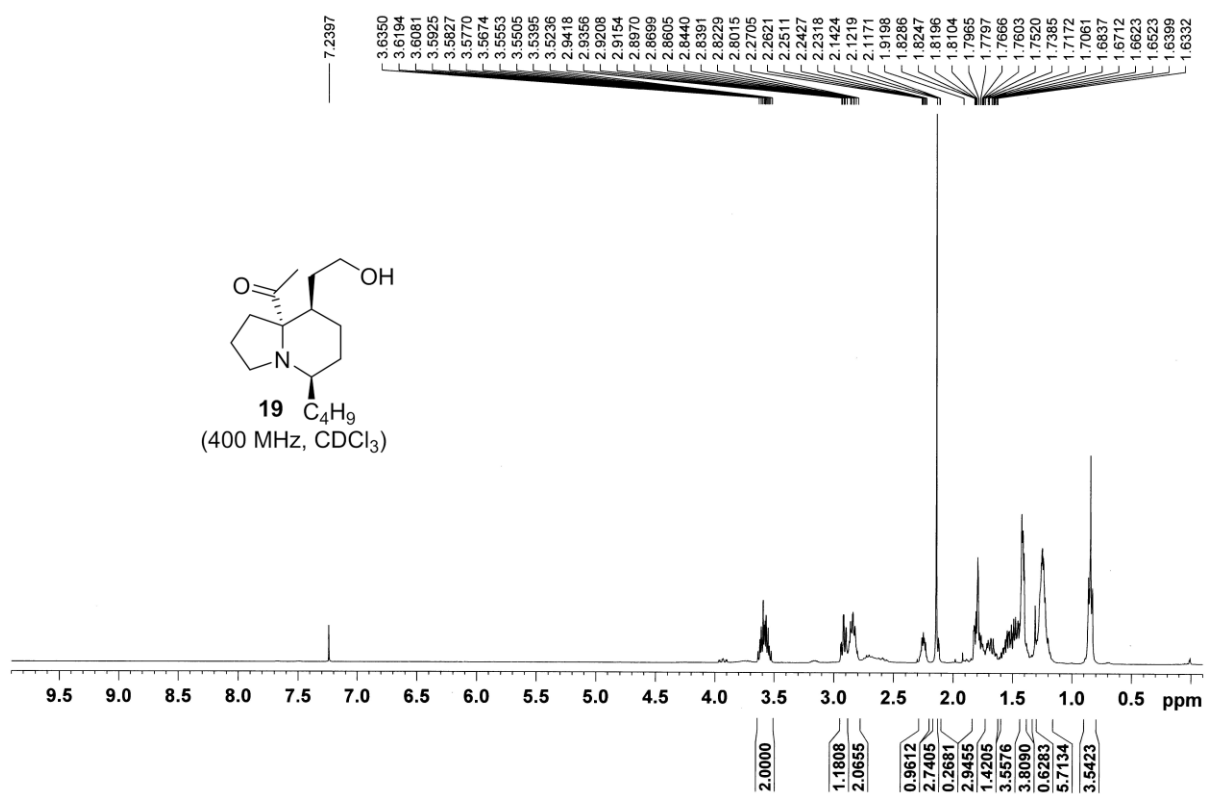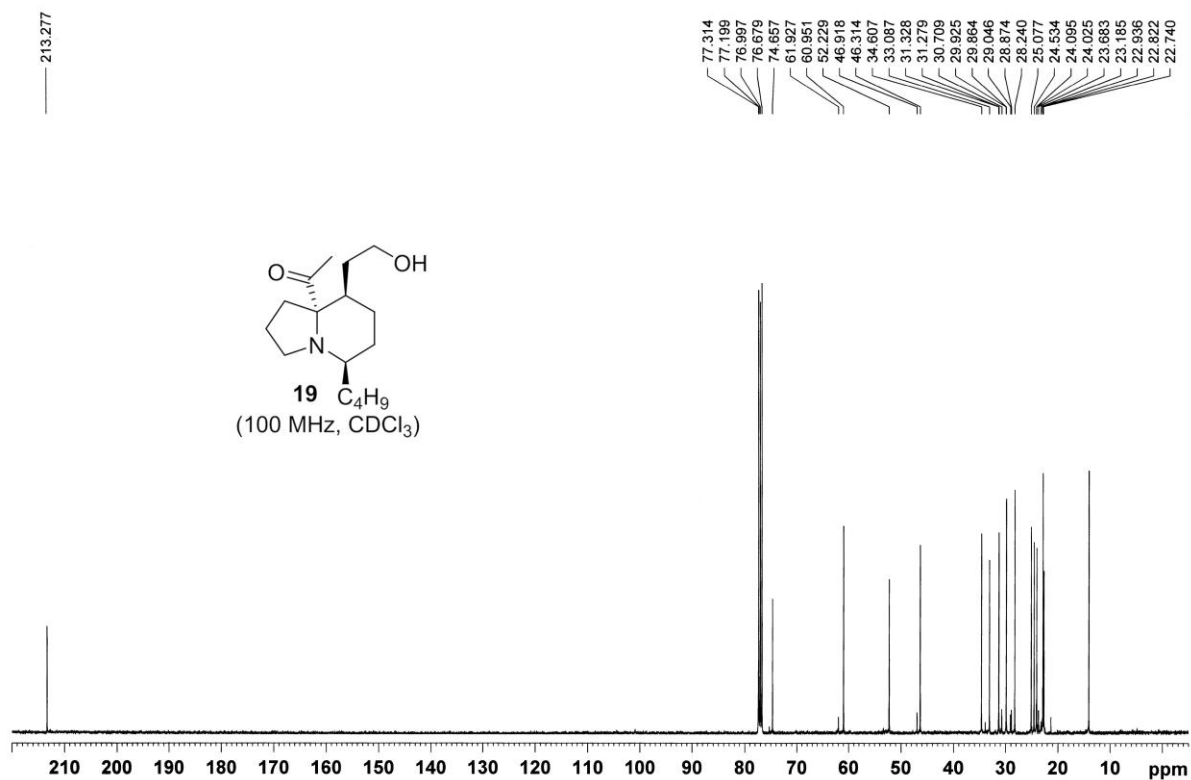

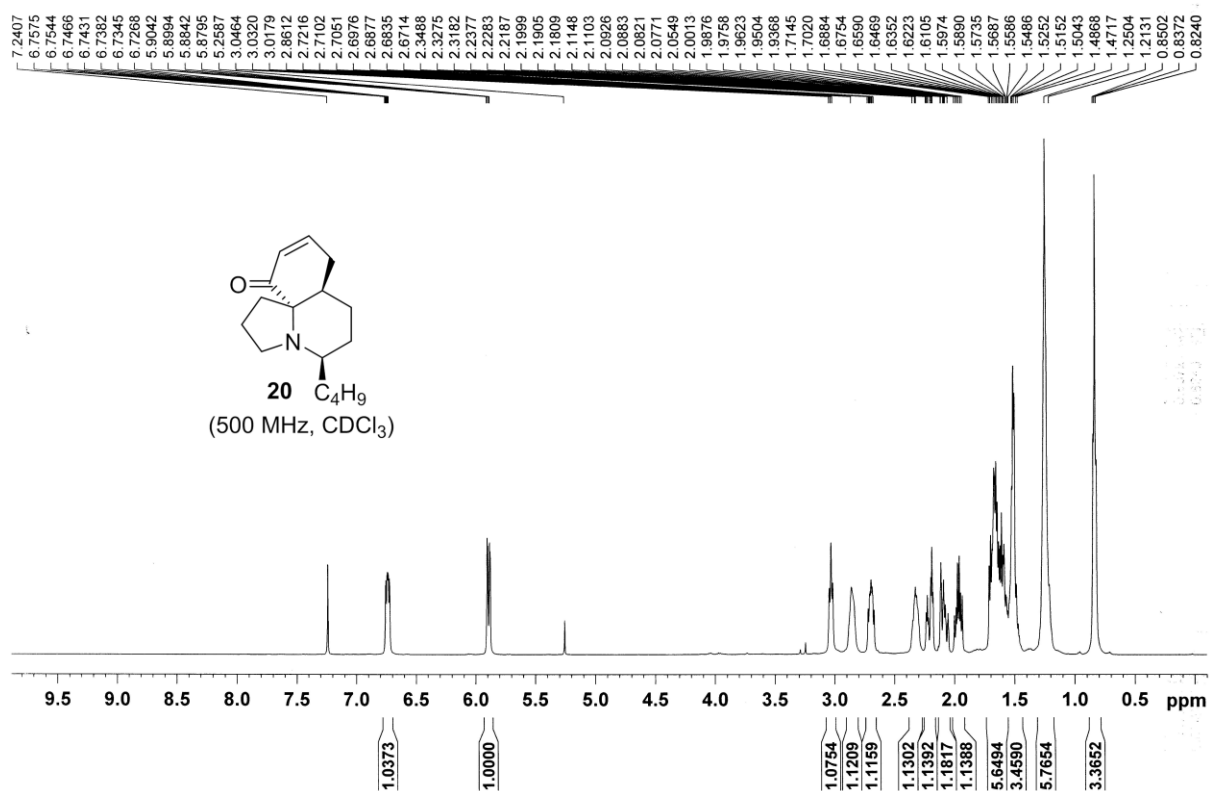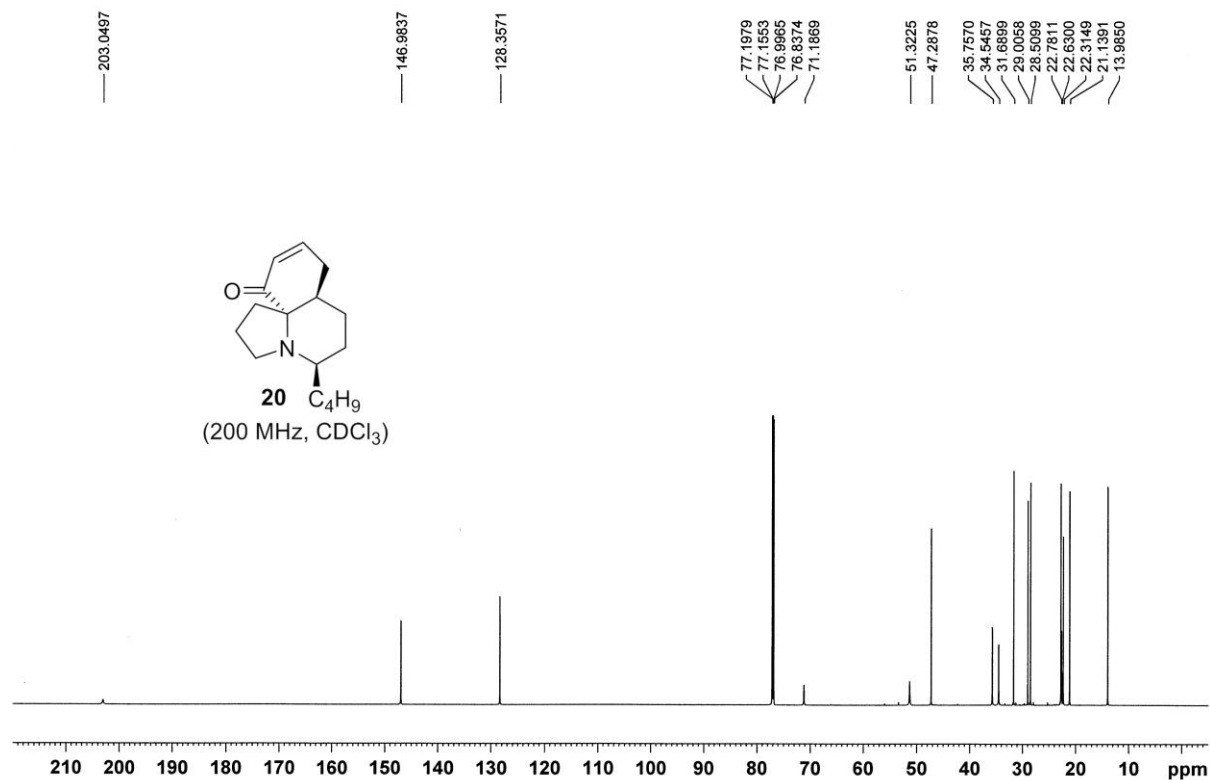

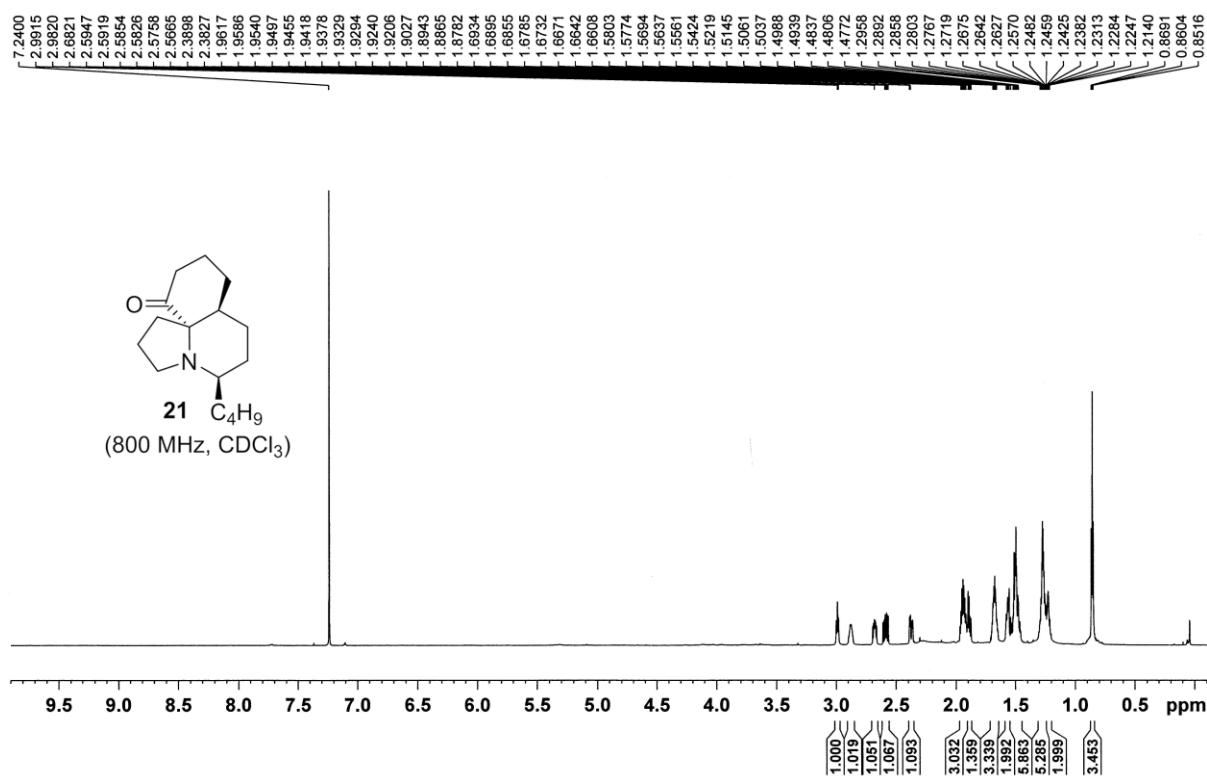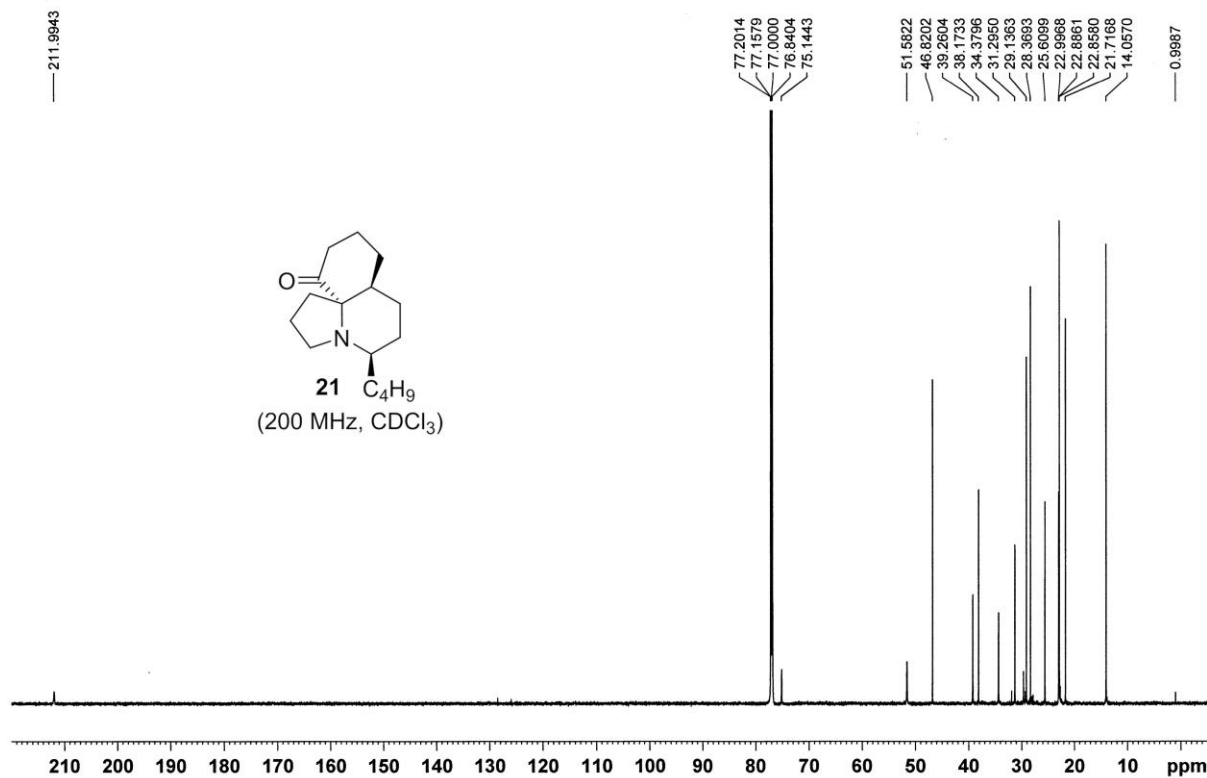

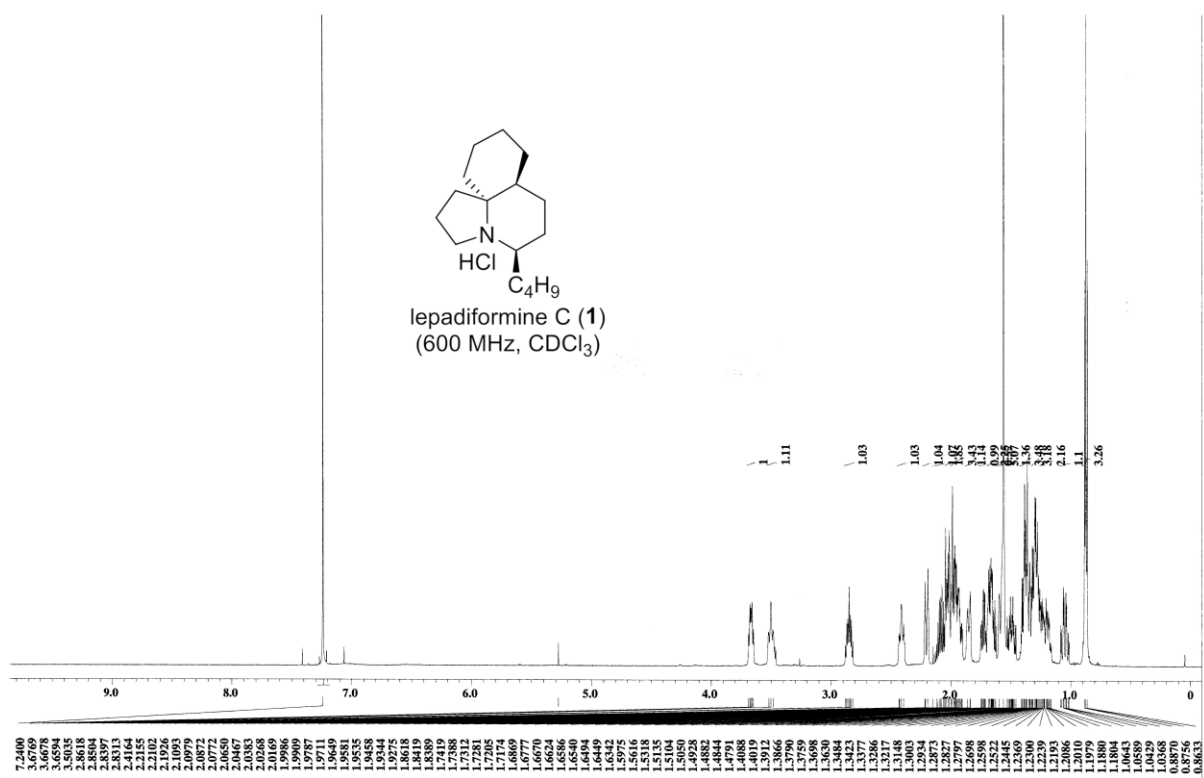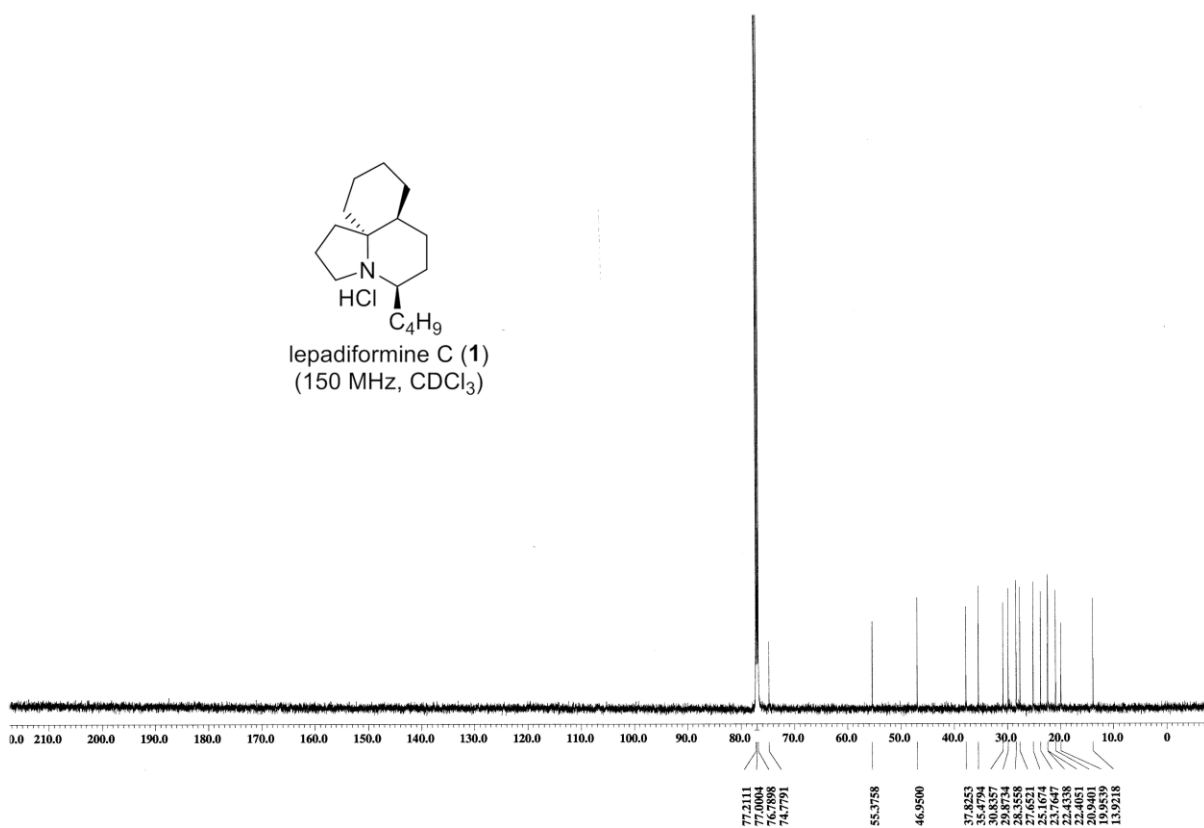

Supplement: Supplementary file 1 [file 7234613]
